1 **The Sec63/BiP complex suppresses higher-order oligomerization and RNase activity of**  
2 **IRE1 $\alpha$  during ER stress**

3

4 Xia Li<sup>1</sup>, Sha Sun<sup>1</sup>, Suhila Appathurai<sup>1</sup>, Arunkumar Sundaram<sup>1</sup>, Rachel Plumb<sup>1</sup>, and Malaiyalam  
5 Mariappan\*

6

7

8

9

10

11

12

13

14 Department of Cell Biology

15 Nanobiology Institute

16 Yale School of Medicine

17 Yale West Campus

18 West Haven, CT 06516, USA

19

20 \* Correspondence: [malaiyalam.mariappan@yale.edu](mailto:malaiyalam.mariappan@yale.edu)

21

22

23

24

25

26

27

28

29

30

31

32

33

34

35

36

37

38

39

40

41

42

43

44

45 **Abstract:** IRE1 $\alpha$  is a conserved branch of the unfolded protein response (UPR) that detects  
46 unfolded proteins in the lumen of the endoplasmic reticulum (ER) and propagates the signal to  
47 the cytosol. We have previously shown that IRE1 $\alpha$  forms a complex with the Sec61 translocon  
48 to cleave its substrate mRNAs (Plumb et al., 2015). This complex also regulates IRE1 $\alpha$   
49 activation dynamics during ER stress in cells (Sundaram et al., 2017), but the underlying  
50 mechanism is unclear. Here, we show that Sec63 is a subunit of the IRE1 $\alpha$ /Sec61 translocon  
51 complex. Sec63 recruits and activates BiP ATPase through its luminal J-domain to bind onto  
52 IRE1 $\alpha$ . This Sec63-mediated BiP binding to IRE1 $\alpha$  suppresses the formation of higher-order  
53 oligomers of IRE1 $\alpha$ , leading to proper attenuation of IRE1 $\alpha$  RNase activity during persistent ER  
54 stress. Thus, our data suggest that the Sec61 translocon bridges IRE1 $\alpha$  with Sec63/BiP to  
55 regulate the dynamics of IRE1 $\alpha$  activity in cells.

56  
57

## 58 Introduction

59

60 Secretory and membrane proteins are initially synthesized and folded in the endoplasmic  
61 reticulum (ER). The majority of these nascent proteins are delivered to the Sec61 translocon in  
62 the ER membrane by the co-translational protein targeting pathway (Rapoport, 2007, Shao and  
63 Hegde, 2011). The Sec61 translocon facilitates the translocation and insertion of newly  
64 synthesized secretory and membrane proteins. Immediately after entering the ER, they are  
65 folded and assembled with the help of glycosylation, chaperones, and folding enzymes in the  
66 ER (van Anken 2005). However, the ER capacity to fold newly synthesized proteins is often  
67 challenged by several conditions, including a sudden increase in incoming protein load,  
68 expression of aberrant proteins, and environmental stress. Under such conditions, terminally  
69 misfolded and unassembled proteins are recognized by the ER associated degradation (ERAD)  
70 pathway for the proteasomal degradation (Brodsky, 2012). When misfolded proteins overwhelm  
71 the ERAD capacity, they accumulate in the ER, thus causing ER stress, which in turn triggers a  
72 signaling network called the unfolded protein response (UPR) (Walter and Ron, 2011). The UPR  
73 restores the ER homeostasis by both reducing incoming protein load as well as increasing the  
74 protein folding capacity of the ER. If ER stress is unmitigated, the UPR has been shown to  
75 initiate apoptosis to eliminate non-functional cells (Hetz, 2012). The UPR-mediated life-and-  
76 death decision is implicated in several human diseases, including diabetes, cancer, and  
77 neurodegeneration (Wang and Kaufman, 2016).

78

79 Three major transmembrane ER stress sensor proteins are localized in the ER, namely  
80 IRE1 $\alpha$ , PERK and ATF6 (Walter and Ron, 2011). IRE1 $\alpha$  is a conserved transmembrane  
81 kinase/endonuclease, which is activated by self-oligomerization and trans-autophosphorylation  
82 during ER stress conditions (Cox et al., 1993; Mori et al., 1993). Once activated, IRE1 $\alpha$   
83 mediates nonconventional splicing of XBP1 mRNA (Yoshida et al., 2001; Calton et al., 2002),  
84 which is recruited to the Sec61 translocon through its ribosome nascent chain (Yanagitani et al.,  
85 2011; Plumb et al., 2015; Kanda et al., 2016). Nearly all endogenous IRE1 $\alpha$  molecules exist in a  
86 complex with the Sec61 translocon in cells (Plumb et al., 2015). The cleaved fragments of XBP1  
87 mRNA are subsequently ligated by the RtcB tRNA ligase (Lu et al., 2014; Jurkin et al., 2014;  
88 Kosmaczewski et al., 2014) with its co-factor archease (Poothong et al., 2017). The spliced

89 XBP1 mRNA is translated into a functional transcription factor, which induces the expression of  
90 chaperones, quality control factors, and protein translocation components (Lee et al., 2003).  
91 IRE1 $\alpha$  can also promiscuously cleave many ER-localized mRNAs through the regulated Ire1-  
92 dependent decay (RIDD) pathway, which is implicated in reducing the incoming protein load to  
93 the ER (Hollien and Weissman, 2006; Han et al., 2009). PERK is a transmembrane kinase and  
94 is responsible for phosphorylating the  $\alpha$  subunit of eIF2 during ER stress, which causes global  
95 inhibition of translation in cells, thus alleviating the burden of protein misfolding in the ER  
96 (Harding et al., 1999; Sood et al., 2000). ATF6 is an ER-localized transcription factor and is  
97 translocated to Golgi upon ER stress where it is cleaved by intramembrane proteases (Haze et  
98 al., 1999; Ye et al., 2000). This causes the release of the cytosolic transcription domain into the  
99 cytosol and to the nucleus where it upregulates genes encoding ER chaperones and quality  
100 control factors to restore ER homeostasis (Lee et al., 2003; Shoulders et al., 2013).

101  
102 The activity of all three UPR sensors are tightly regulated both under homeostatic and  
103 ER stress conditions, but the underlying mechanisms are poorly understood. In particular, it is  
104 important to understand the regulation of IRE1 $\alpha$  activity since sustained activation of IRE1 $\alpha$  is  
105 implicated in many human diseases including type 2 diabetes (Lin et al., 2007; Ghosh et al.,  
106 2014). On the other hand, hyperactivated IRE1 $\alpha$  can produce excess of XBP1 transcription  
107 factor, which can be beneficial for tumor cell growth in a hostile environment (Cubillos-Ruiz et  
108 al., 2017). Recent studies have identified many IRE1 $\alpha$  interacting proteins that have been  
109 shown to regulate IRE1 $\alpha$  activation and inactivation during ER stress (Eletto et al., 2014;  
110 Sundaram et al., 2017; Sepulveda et al., 2018). One of the key factors that regulate IRE1 $\alpha$   
111 activity is the luminal Hsp70 like chaperone BiP ATPase (Bertolotti et al., 2000; Okamura et al.,  
112 2000; Pincus et al., 2010; Amin-Wetzel et al., 2017). IRE1 $\alpha$  binding to BiP inhibits its  
113 oligomerization, thereby suppressing its RNase activity. However, it is unclear how the luminal  
114 protein BiP is efficiently recruited to the membrane-localized IRE1 $\alpha$  in cells. Our previous  
115 studies have shown that IRE1 $\alpha$  interaction with the Sec61 translocon is essential to regulate its  
116 oligomerization and RNase activity in cells (Sundaram et al., 2017). However, the molecular  
117 mechanism by which the Sec61 translocon limits IRE1 $\alpha$  activity is unclear. In this study, we  
118 found that the Sec61 translocon bridges the interaction between IRE1 $\alpha$  and Sec63. The J  
119 domain of Sec63 is responsible for recruiting and activating the luminal BiP ATPase to bind onto  
120 IRE1 $\alpha$ , thus suppressing IRE1 $\alpha$  higher order oligomerization and RNase activity.

121

## 122 **Results**

123

### 124 **Sec61 translocon-mediates the interaction between IRE1 $\alpha$ and Sec63**

125 To determine the mechanism by which the Sec61 translocon limits IRE1 $\alpha$  oligomerization and  
126 RNase activity, we looked back at our previous results on IRE1 $\alpha$  interacting proteins (Plumb et  
127 al., 2015 and Sundaram et al., 2017). In addition to the Sec61 translocon, Sec63 is also  
128 enriched in the affinity purified IRE1 $\alpha$  sample. Sec63 is a conserved translocon interacting  
129 membrane protein involved in protein translocation into the ER (Deshaies et al., 1991; Panzner  
130 et al., 1995; Meyer et al., 2000). While Sec63 is known to play a key role in the post-  
131 translational protein translocation into the ER, it can also assist the co-translational protein  
132 translocation into the ER (Brodsky et al., 1995; Young et al., 2001; Conti et al., 2015). We first

133 investigated whether IRE1 $\alpha$  interacts with Sec63 through the Sec61 translocon. To test this, we  
134 immunoprecipitated several translocon interaction defective IRE1 $\alpha$  mutants and looked for an  
135 association with Sec63 (Figure 1A). These IRE1 $\alpha$  mutants showed a weak association with  
136 Sec63 as well, suggesting that IRE1 $\alpha$  interacts with Sec63 via the Sec61 translocon (Figure 1A,  
137 B). Interestingly, IRE1 $\alpha$  did not coimmunoprecipitate with Sec62, which is known to form a  
138 complex with Sec61/Sec63 (Panzner et al., 1995). In addition to the previously described  
139 luminal juxtamembrane region (Plumb et al., 2015), we identified that the transmembrane  
140 domain (TMD) of IRE1 $\alpha$  also important for the interaction with Sec61/Sec63 since replacing  
141 IRE1 $\alpha$  TMD with the TMD from calnexin abolished the interaction with the translocon complex  
142 (Figure 1A, B). We reasoned that if IRE1 $\alpha$  interacts with Sec63 through the translocon,  
143 depletion of Sec63 would have less effect on the interaction between IRE1 $\alpha$  and the translocon.  
144 To test this, we generated HEK293 Sec63 $^{-/-}$  cells using CRISPR/Cas9. Immunoprecipitation of  
145 IRE1 $\alpha$  from wild type cells revealed an interaction between IRE1 $\alpha$  and the Sec61/Sec63  
146 complex (Figure 1C). As expected, the translocon interaction defective mutant IRE1 $\alpha\Delta 10$   
147 showed almost no association with Sec63. The knockout of Sec63 slightly reduced but did not  
148 abolish the interaction between IRE1 $\alpha$  and Sec61, suggesting that IRE1 $\alpha$  can interact with the  
149 translocon independent of Sec63 (Figure 1C). Again, IRE1 $\alpha$  selectively interacted with a Sec61  
150 translocon complex that contains Sec63, but not Sec62. This observation is further supported by  
151 the evidence that Sec63 mutants that poorly interacted with the Sec61 translocon also showed  
152 less interaction with the endogenous IRE1 $\alpha$  (Figure 1D; Figure 1 - figure supplement 1).  
153 Sec61/Sec63 selectively interacted with the IRE1 $\alpha$  branch of the UPR since they did not interact  
154 with either PERK or ATF6 (Figure 1D). We next asked whether the interaction between Sec63  
155 and IRE1 $\alpha$  is preserved during ER stress conditions to regulate IRE1 $\alpha$  RNase activity. To test  
156 this, we immunoprecipitated Sec63 from Sec63 $^{-/-}$  cells complemented with wild type Sec63-  
157 FLAG that were treated with or without ER stress inducers, thapsigargin (Tg), tunicamycin (Tm)  
158 or dithiothreitol (DTT) (Figure 1E). Sec63 interaction with the endogenous IRE1 $\alpha$  was slightly  
159 disrupted upon treatment of the cells with Tg, TM, or DTT for 4h, suggesting that Sec63 may  
160 play an important role in regulating IRE1 $\alpha$  activity during ER stress. However, a longer ER  
161 stress treatment with DTT (8h) severely disrupted the IRE1/Sec63/Sec61 complex (Figure 1E).

162

### 163 **Sec63 suppresses the higher-order oligomerization of IRE1 $\alpha$**

164 It is known that IRE1 $\alpha$  forms higher-order oligomers or clusters in cells upon ER stress, which  
165 correlate with IRE1 $\alpha$  RNase activity (Li et al., 2010). We have previously shown that IRE1 $\alpha$   
166 interaction with the Sec61 translocon is crucial for limiting IRE1 $\alpha$  clusters in cells during ER  
167 stress conditions (Sundaram et al., 2017). We speculated that this activity was mainly due to the  
168 Sec61 translocon-associated Sec63, which can recruit BiP through its luminal J domain to  
169 suppress IRE1 $\alpha$  higher-order oligomers. To test this idea, we performed siRNA mediated  
170 knockdown of Sec63 in cells and monitored IRE1 $\alpha$  clustering by confocal immunofluorescence  
171 after treatment with the ER stress inducing agent Tg. IRE1 $\alpha$  was localized to the ER without  
172 clustering under homeostatic conditions, while a small number of cells exhibited clusters upon  
173 ER stress in control siRNA treated cells (Figure 2A, B, C). By contrast, IRE1 $\alpha$  clusters were  
174 increased in Sec63 depleted cells treated with ER stress (Figure 2A, B, C). An alternative  
175 explanation for IRE1 $\alpha$  clustering in Sec63 depleted cells is that it may be caused by defects in  
176 protein translocation into the ER in these cells. To rule out this possibility, we performed siRNA

177 mediated knockdown of Sec62, which is also a core component of the post-translational  
178 translocation machinery. Unlike Sec63, transient depletion of Sec62 did not significantly  
179 increase IRE1 $\alpha$  clusters upon ER stress compared to control siRNA treated cells (Figure 2A, B,  
180 C). To further differentiate the role of Sec63 in regulating IRE1 $\alpha$  oligomerization from assisting  
181 protein translocation into the ER lumen, we used the IRE1 $\alpha$  CNX-TMD mutant, which we  
182 identified in this study as a Sec61/Sec63 interaction defective mutant (Figure 1B). Consistent  
183 with our previous translocon interaction defective IRE1 $\alpha$  mutants (Sundaram et al., 2017), the  
184 cells expressing IRE1 $\alpha$  CNX-TMD displayed significantly more clusters than the cells  
185 expressing wild type IRE1 $\alpha$  upon treatment with either Tg for 1h and 2h or Tm for 2h (Figure 2D,  
186 E). However, both the wild type and IRE1 $\alpha$  CNX-TMD formed robust clusters upon treatment of  
187 cells with Tm for 4h, although the clusters were slightly bigger in cells expressing the mutant  
188 (Figure 2D, E). We next determined if the J-domain of Sec63 is required for limiting IRE1 $\alpha$   
189 clustering in cells. The cells expressing Sec63 J-domain mutant (HPD/AAA) exhibited more  
190 IRE1 $\alpha$  clusters upon ER stress compared to cells expressing wild type Sec63 (Figure 2F, G, H).  
191 Taken together, these results suggest that IRE1 $\alpha$  forms robust clusters in cells upon ER stress,  
192 either if it cannot interact with Sec61/Sec63 or in cells depleted of Sec63.

193

### 194 **Sec63 limits IRE1 $\alpha$ RNase activity in cells during ER stress**

195 The aforementioned data suggest that Sec63 inhibits the formation of higher-order  
196 oligomerization of IRE1 $\alpha$  during ER stress. We next wanted to determine if Sec63 also limits  
197 IRE1 $\alpha$  RNase activity. To test this, we first transiently depleted Sec63 in cells using siRNA  
198 oligos and monitored IRE1 $\alpha$  activation under homeostatic conditions by probing its  
199 phosphorylation status using a phos-tag based immunoblotting. We found that only a small  
200 fraction of IRE1 $\alpha$  was activated in Sec63 depleted cells under homeostatic conditions (Figure 3  
201 – figure supplement 1A). This small activation was likely caused by defects in protein  
202 translocation into the ER in Sec63 depleted cells because a similar level of IRE1 $\alpha$  activation  
203 was observed in cells depleted of Sec62, which is also a subunit of the protein translocation  
204 complex (Figure 3 – figure supplement 1A). To determine the role of Sec63 in suppressing  
205 IRE1 $\alpha$  activity during ER stress conditions, we monitored IRE1 $\alpha$  phosphorylation and its RNase-  
206 mediated splicing of XBP1 mRNA in both wild type and Sec63 $^{-/-}$  cells treated with Tg. A  
207 significant proportion of IRE1 $\alpha$  was activated after one hour of ER stress as represented by  
208 phosphorylated IRE1 $\alpha$  (Figure 3A). Consistent with our previous studies, IRE1 $\alpha$  was mostly  
209 inactivated or dephosphorylated within eight hours of ER stress in wild type cells. The  
210 phosphorylation status of IRE1 $\alpha$  was comparable with IRE1 $\alpha$ -mediated splicing of XBP1 mRNA  
211 (Figure 3A). The ER stress-dependent BiP upregulation was also correlated with the inactivation  
212 of IRE1 $\alpha$  in wild type cells. Corroborating the result from siRNA-mediated depletion of Sec63, a  
213 proportion of IRE1 $\alpha$  was constitutively phosphorylated in Sec63 $^{-/-}$  cells even under homeostatic  
214 conditions. Upon ER stress, IRE1 $\alpha$  was fully activated in Sec63 $^{-/-}$  cells, but it showed a severe  
215 defect in inactivation of IRE1 $\alpha$  as reflected by efficient phosphorylation of IRE1 $\alpha$  even during the  
216 later hours of ER stress compared to wild type cells (Figure 3A). The continuous IRE1 $\alpha$   
217 phosphorylation during persistent ER stress correlated with its ability to mediate the splicing of  
218 XBP1 mRNA (Figure 3A). Interestingly, although BiP was highly upregulated in Sec63 $^{-/-}$  cells  
219 (Figure 3 – figure supplement 2C), it could not inactivate IRE1 $\alpha$  in the absence of Sec63. We  
220 also obtained a similar result when cells were treated with the ER stress inducer Tm (Figure 3 –



221 figure supplement 1B), arguing against that defective attenuation of IRE1 $\alpha$  in Sec63 $^{-/-}$  cells was  
222 specific to the ER stress inducer Tg.

223  
224 To exclude the possibility that the knockout of Sec63 had indirect effects on IRE1 $\alpha$   
225 activity, we wanted to rescue IRE1 $\alpha$  inactivation defects by complementing wild type Sec63 into  
226 Sec63 $^{-/-}$  cells. The complementation of Sec63 partially restored activation and inactivation  
227 kinetics of IRE1 $\alpha$  as shown by both IRE1 $\alpha$  phosphorylation and XBP1 mRNA splicing (Figure  
228 3B and Figure 3 - figure supplement 1C). By contrast, a proportion of IRE1 $\alpha$  was constitutively  
229 activated even under homeostatic conditions in Sec63 $^{-/-}$  cells complemented with Sec63 J-  
230 domain mutant, which is deficient in activating BiP ATPase (Figure 3B and Figure 3 - figure  
231 supplement 1C). Upon ER stress, IRE1 $\alpha$  was efficiently activated in these cells but could not be  
232 attenuated even up to 24h of ER stress, suggesting that the J-domain of Sec63 is required for  
233 suppressing IRE1 $\alpha$  activity during ER stress. We also complemented Sec63 $^{-/-}$  cells with Sec63  
234 mutants ( $\Delta$ 367-760 and  $\Delta$ 637-760) that have intact J-domains but poorly interacted with the  
235 Sec61 translocon (Figure 1 – figure supplement 1). These mutants failed to rescue IRE1 $\alpha$   
236 attenuation defects observed in Sec63 $^{-/-}$  cells during ER stress (Figure 3 – figure supplement  
237 1D). This result implies that Sec63-mediated recruitment of BiP to the ER membrane is not  
238 sufficient to inactivate IRE1 $\alpha$ , but rather IRE1 $\alpha$  must be close to Sec63/BiP for an efficient  
239 attenuation of its activity during persistent ER stress. Since Sec63 is involved in protein  
240 translocation into the ER, we wanted exclude the possibility that IRE1 $\alpha$  attenuation defects were  
241 not caused by an inefficient protein translocation into the ER. We therefore created  
242 CRISPR/Cas9-mediated knockout cells of Sec62, which did not interact with IRE1 $\alpha$  (Figure 1B,  
243 C). In sharp contrast to Sec63 $^{-/-}$  cells, the activation of IRE1 $\alpha$  was mostly inhibited in Sec62 $^{-/-}$   
244 cells upon ER stress compared to wild type cells (Figure 3 – figure supplement 1E). Because  
245 Sec63 is still present in Sec62 $^{-/-}$  cells, it is likely that it can efficiently recruit BiP, which was  
246 highly upregulated in these cells, and suppress the activation of IRE1 $\alpha$  during ER stress. This  
247 notion is supported by our previous study that overexpression of recombinant BiP into HEK293  
248 cells can suppress the activation of endogenous IRE1 $\alpha$  (Sundaram et al., 2018).

249  
250 To determine whether Sec63 also regulates the activities of two other major UPR  
251 sensors, PERK and ATF6, we monitored their activation in wild type and Sec63 $^{-/-}$  cells during  
252 ER stress. Consistent with previous studies, PERK was activated as shown by phosphorylation  
253 in wild type cells upon ER stress and remained active throughout the ER stress treatment  
254 (Figure 3 – figure supplement 2A, B). We did not detect any appreciable constitutive activation  
255 of PERK in Sec63 $^{-/-}$  cells under homeostatic conditions. Moreover, it was normally activated  
256 upon ER stress induced by either Tg or TM (Figure 3 – figure supplement 2A, B). This result is  
257 consistent with the previous study where the depletion of Sec63 did not affect both PERK and  
258 ATF6-mediated UPR pathways (Fedele et al., 2015). We next probed the activation of ATF6 in  
259 both wild type and Sec63 $^{-/-}$  cells by monitoring the loss of signal due to the proteolytic release  
260 of the N-terminal fragment after its migration to the Golgi apparatus (Figure 3 – figure  
261 supplement 2A, B). ATF6 signal was lost after one hour of ER stress, but the signal came back  
262 after eight hours of the treatment in the wild type cells. To our surprise, ATF6 was poorly  
263 activated in Sec63 $^{-/-}$  cells during Tg-induced ER stress, but it was noticeably activated upon Tm  
264 treatment (Figure 3 – figure supplement 2A, B). We hypothesized that ATF6 was not fully

265 activated in Sec63<sup>-/-</sup> cells due to the accumulation of excess of BiP in Sec63<sup>-/-</sup> cells, which may  
266 not be easily sequestered by misfolded proteins induced by the ER stress inducer Tg or Tm. We  
267 therefore treated Sec63<sup>-/-</sup> cells with a strong ER stress inducer, DTT, and monitored ATF6  
268 activation. Indeed, ATF6 could be activated in Sec63<sup>-/-</sup> cells as shown by the loss of signal  
269 upon DTT treatments, suggesting that ATF6 is functional in Sec63<sup>-/-</sup> cells (Figure 3 – figure  
270 supplement 2C). Lastly, we wanted to determine the role of Sec63 in attenuating IRE1 $\alpha$  activity  
271 using an approach that does not disrupt the function of Sec63 in cells. We therefore monitored  
272 IRE1 $\alpha$  activity in cells expressing either wild type IRE1 $\alpha$  or IRE1 $\alpha$  CNX-TMD, which cannot  
273 interact with Sec61/Sec63. In support of our conclusion, IRE1 $\alpha$  CNX-TMD could be efficiently  
274 activated upon ER stress but displayed a defect in attenuation compared to wild type IRE1 $\alpha$  as  
275 shown by both phosphorylation and XBP1 mRNA splicing during persistent ER stress (Figure  
276 3C). This result is consistent with our previous results of other IRE1 $\alpha$  mutants that poorly  
277 interact with the Sec61 translocon (Sundaram et al., 2017). Taken together, our data suggest  
278 that IRE1 $\alpha$  inactivation was significantly impaired during ER stress, either in the absence of  
279 Sec63 or if it failed to interact with Sec63.

280

### 281 **The Sec61/Sec63 complex recruits BiP to bind onto IRE1 $\alpha$**

282 We next wanted to determine IRE1 $\alpha$  binding to BiP depends on its interaction with the  
283 Sec61/Sec63 complex. To test this, we took advantage of our various Sec61/Sec63 interaction  
284 defective IRE1 $\alpha$  mutants (Figure 1B) and performed co-immunoprecipitation studies to monitor  
285 their interaction with BiP. Wild type IRE1 $\alpha$  associated with BiP along with the Sec61/Sec63  
286 complex, whereas the translocon interaction defective IRE1 $\alpha$  mutants showed a significantly  
287 less interaction with BiP (Figure 4A). IRE1 $\alpha$  mutant that is deleted of the luminal domain (LD)  
288 showed a very little binding to BiP, although its interaction with Sec61/Sec63 was mostly  
289 unaffected (Figure 4A). This result suggests that BiP binds to the luminal domain of IRE1 $\alpha$ , but  
290 not to the Sec61/Sec63 complex. To further support our conclusion that IRE1 $\alpha$  binds to BiP but  
291 not to the Sec61/Sec63 complex, we co-immunoprecipitated IRE1 $\alpha$  using either digitonin or  
292 NP40/Deoxycholate detergent buffer. IRE1 $\alpha$  associated with BiP under both conditions, while its  
293 interaction with Sec61/Sec63 was almost abolished when immunoprecipitations were performed  
294 using the buffer containing NP40/Deoxycholate compared to the digitonin buffer (Figure 4 –  
295 figure supplement 1A, B). The recruitment of BiP to IRE1 $\alpha$  was also dependent on the J-domain  
296 of Sec63 since overexpression of Sec63 J-domain mutant in cells reduced BiP binding to IRE1 $\alpha$   
297 compared to cells overexpressing wild type Sec63 (Figure 4 – figure supplement 1C). We next  
298 confirmed whether BiP binding to IRE1 $\alpha$  is sensitive to ER stress as previously reported  
299 (Bertolotti et al., 2000). Immunoprecipitation of IRE1 $\alpha$  from cells treated without or with ER  
300 stress induced by DTT, Tg, or Tm revealed that BiP was dissociated from IRE1 $\alpha$  under all ER  
301 stress conditions compared non-treated cells (Figure 4B). As expected, BiP binding to a  
302 translocon interaction defective mutant IRE1 $\alpha$  CNX-TMD was significantly reduced even under  
303 unstressed conditions, and that the interaction was almost abolished upon treatment with ER  
304 stress inducers (Figure 4B). We observed that BiP was upregulated in Tm treated cells  
305 compared to DTT or Tg treated cells. This is likely due to the longer time treatment (4h) of Tm  
306 while others were treated for a shorter time (2h). We also noticed that IRE1 $\alpha$  interaction with  
307 Sec63/Sec61 was slightly reduced under ER stress conditions compared to unstressed  
308 conditions (Figure 4B). We next asked whether Sec61/Sec63 is necessary and sufficient to

309 mediate BiP binding to IRE1 $\alpha$ . To address this, we purified the IRE1 $\alpha$ /Sec61/Sec63 complex  
310 from HEK293 cells stably expressing 2xStrep-tagged IRE1 $\alpha$ -FLAG as previously described  
311 (Sundaram et al., 2017) (Figure 4C). A coomassie stained gel revealed that IRE1 $\alpha$  was about  
312 three times more than Sec61/Sec63 because the complex was purified from cells  
313 overexpressing IRE1 $\alpha$ . We also similarly purified IRE1 $\alpha\Delta$ 10, which lacks the interaction with the  
314 Sec61/Sec63 complex, as a control. We expressed and purified recombinant BiP from *E. coli*  
315 (Figure 4D). We first prepared anti-FLAG antibody beads bound to the IRE1 $\alpha$  complex or  
316 IRE1 $\alpha\Delta$ 10. We then incubated the beads with or without BiP in the presence or absence of  
317 ATP. In the absence of ATP, BiP bound to both the IRE1 $\alpha$ /Sec61/Sec63 complex and  
318 IRE1 $\alpha\Delta$ 10. BiP was mostly dissociated from IRE1 $\alpha\Delta$ 10 in the presence of ATP (Figure 4E),  
319 likely due to ATP bound BiP has higher substrate dissociation rates (Misselwitz et al., 1998). In  
320 sharp contrast, BiP binding to IRE1 $\alpha$ /Sec61/Sec63 was intact even in the presence of ATP  
321 (Figure 4E). This result suggests that the J-domain of Sec63 stimulated ATP hydrolysis of BiP to  
322 bind onto IRE1 $\alpha$ . We also obtained a similar result of Sec61/Sec63 dependent BiP binding onto  
323 IRE1 $\alpha$  when the components were incubated in solution, followed by immunoprecipitation with  
324 anti-FLAG beads (Figure 4 – figure supplement 1D). Taken together our results suggest that  
325 Sec61/Sec63 is necessary and sufficient to mediate BiP binding to IRE1 $\alpha$  in the presence of  
326 ATP.

327

## 328 Discussion

329

330 We and others have previously shown that IRE1 $\alpha$  forms a complex with the Sec61 translocon  
331 complex (Plumb et al., 2015; Acosta-Alvear et al., 2018; Ishikawa et al., 2019). The complex  
332 formation allows IRE1 $\alpha$  to access its substrate mRNAs, including XBP1u mRNA, which is  
333 delivered to the Sec61 translocon through its ribosome-nascent chain (Plumb et al., 2015;  
334 Kanda et al., 2016). Also, IRE1 $\alpha$  association with the Sec61 translocon inhibits its higher-order  
335 oligomerization and RNase activity during ER stress (Sundaram et al., 2017). In this study, we  
336 show that the translocon associated factor Sec63 recruits and activates BiP ATPase via its  
337 luminal J-domain to bind onto IRE1 $\alpha$ , thus suppressing higher-order oligomerization and RNase  
338 activity of IRE1 $\alpha$  during ER stress (Figure 5).

339

340 It has long been known that BiP plays a central role in regulating all three UPR sensors  
341 (Preissler and Ron, 2019). Recent studies have provided further insights into how BiP regulates  
342 oligomerization and activation of IRE1 $\alpha$  (Carrara et al., 2015; Kopp et al., 2018; Amin-Wetzel et  
343 al., 2017). More recently, the formation of higher-order oligomers or clusters of IRE1 $\alpha$  has been  
344 shown to be regulated by BiP during ER stress (Ricci et al., 2019). However, it is unclear how  
345 the luminal BiP is recruited to the membrane localized IRE1 $\alpha$ , which is extremely low abundant  
346 (Kulak et al., 2014), to regulate IRE1 $\alpha$  oligomerization and activation. Our previous studies have  
347 shown that most of the endogenous IRE1 $\alpha$  proteins are in complex with the Sec61 translocon  
348 complex (Plumb et al., 2015). In this study, we show that Sec63 is a part of the IRE1 $\alpha$ /Sec61  
349 translocon complex. Since Sec63 contains a J domain that is known to recruit and activate BiP  
350 to bind onto translocating nascent chains (Matlack et al., 1999), we hypothesized that Sec63  
351 recruited BiP might also bind and suppress IRE1 $\alpha$  oligomerization and activation. Our  
352 interaction studies suggest that the Sec61 translocon bridges the interaction between IRE1 $\alpha$



353 and Sec63. Although Sec62 is known to associate with Sec63, it is not enriched in IRE1 $\alpha$   
354 immunoprecipitates, suggesting that IRE1 $\alpha$  selectively interacts with a Sec61 translocon  
355 complex that contains Sec63, but not sec62. This is consistent with the depletion of Sec63, but  
356 not Sec62, induces the formation of IRE1 $\alpha$  clusters upon ER stress. Specifically, the J domain  
357 of Sec63 is required for suppressing IRE1 $\alpha$  clusters. It is unlikely that IRE1 $\alpha$  clustering in Sec63  
358 depleted cells is induced by defects in the protein translocation into the ER since Sec62  
359 depleted cells display less IRE1 $\alpha$  clusters upon ER stress. This notion is further supported by  
360 our observation that the Sec61/Sec63 interaction defective mutants are able to form robust  
361 clusters upon ER stress (Sundaram et al., 2017).

362

363 Our studies show that increased levels of IRE1 $\alpha$  clusters in Sec63 deficient cells lead to  
364 a severe defect in attenuation of IRE1 $\alpha$  RNase activity during persistent ER stress. This  
365 observation resembles the attenuation defects of IRE1 $\alpha$  mutants that cannot efficiently interact  
366 with Sec61/Sec63. We envision that such defects in attenuation of IRE1 $\alpha$  signaling may be  
367 detrimental to cells burdened with high levels of secretory proteins such as pancreatic beta cells  
368 (Back and Kaufman, 2012). Surprisingly, Sec63 mutants that have a functional luminal J-  
369 domain, but do not interact with the Sec61 translocon also fail to rescue IRE1 $\alpha$  attenuation  
370 defects in Sec63 $^{-/-}$  cells. This result emphasizes that the J-domain containing protein must be  
371 close proximal to IRE1 $\alpha$  in order to recruit BiP and suppress higher-order oligomerization and  
372 RNase activity of IRE1 $\alpha$  during ER stress. This view is further supported by our observation that  
373 highly upregulated BiP in Sec63 $^{-/-}$  cells cannot inhibit the activation of IRE1 $\alpha$  during ER stress.  
374 Conversely, the activation of IRE1 $\alpha$  is completely inhibited in Sec62 $^{-/-}$  cells during ER stress,  
375 likely due to the presence of Sec63 in these cells can efficiently recruit highly upregulated BiP to  
376 bind onto IRE1 $\alpha$ .

377

378 The ER contains seven J-domain containing proteins localized in the ER lumen where  
379 they can interact with BiP (Pobre et al., 2019). It is conceivable that other J-domain containing  
380 proteins can compensate the J-domain function of Sec63 in Sec63 $^{-/-}$  cells or cells expressing  
381 IRE1 $\alpha$  mutants that cannot interact with Sec63. Indeed, a small fraction of IRE1 $\alpha$  can be  
382 attenuated in Sec63 $^{-/-}$  cells, but the majority of IRE1 $\alpha$  cannot be inactivated during persistent  
383 ER stress. Although our data show that Sec63 plays a major role in attenuating IRE1 $\alpha$  activity  
384 during ER stress, our studies do not provide evidence on whether Sec63 controls the initial  
385 activation of IRE1 $\alpha$  upon ER stress as the depletion Sec63 only partially activates IRE1 $\alpha$  under  
386 homeostatic conditions. This partial activation of IRE1 $\alpha$  is likely caused by the accumulation of  
387 misfolded proteins in the ER lumen since the inhibition of protein synthesis can attenuate IRE1 $\alpha$   
388 activity in Sec63 depleted cells (Fedele et al., 2015).

389

390 Two of our experimental evidence suggest that Sec63 is responsible for recruiting  
391 luminal BiP to bind and suppress IRE1 $\alpha$  higher-order oligomerization and RNase activity during  
392 ER stress. First, IRE1 $\alpha$  mutants that are deficient in interacting with Sec61/Sec63 show a  
393 significantly less binding to BiP. This result also suggests that BiP that binds to IRE1 $\alpha$  is mainly  
394 recruited through Sec63 in cells. It is possible that these IRE1 $\alpha$  mutants also disrupt their  
395 interaction with other luminal proteins such as other ERdj proteins. However, this is unlikely  
396 since the Sec61/Sec63 interacting region is localized in both luminal juxtamembrane and

397 transmembrane regions of IRE1 $\alpha$ , which should not interfere with IRE1 $\alpha$  luminal domain  
398 interaction with soluble luminal proteins. Second biochemical reconstitution experiments with  
399 purified proteins suggest that Sec61/Sec63 is sufficient and necessary to mediate BiP binding to  
400 IRE1 $\alpha$  in the presence of ATP. Although BiP binding to IRE1 $\alpha$ /Sec61/Sec63 is persistent in the  
401 presence of ATP, but its binding to IRE1 $\alpha$  is not significantly increased compared to the  
402 condition without ATP. This is likely due to three times less amount of Sec63 over IRE1 $\alpha$  in our  
403 in vitro reactions, while the concentration of Sec63 is vastly abundant than IRE1 $\alpha$  in cells (Kulak  
404 et al., 2014). Also, the presence of detergent, which is added to keep the membrane proteins  
405 soluble, in reactions may disrupt the efficient binding of BiP to IRE1 $\alpha$ .

406

407         Since the Sec61 translocon selectively associates with the IRE1 $\alpha$  branch of the UPR,  
408 depletion of Sec63 has less effects on activation PERK and ATF6. This is consistent with  
409 previous studies that either depletion of Sec63 or Sec61 selectively activated IRE1 $\alpha$  (Adamson  
410 et al., 2016; Fedeles et al., 2015). However, ATF6 activation is significantly inhibited in Sec63-/-  
411 cells upon ER stress. Although it is not clear the exact cause for this effect, one explanation is  
412 that highly upregulated BiP in these cells can effectively suppress ATF6 activation. This notion  
413 is supported by our previous studies that the overexpression of recombinant BiP in cells mostly  
414 inhibits the activation of ATF6 and IRE1 $\alpha$  but has a little effect on the activation of PERK during  
415 ER stress (Sundaram et al., 2018). Furthermore, ATF6 in Sec63-/- cells can be activated using  
416 the strong ER stress inducer DTT. Since the attenuation kinetics of ATF6 during ER stress  
417 closely resembles IRE1 $\alpha$  in wild type cells, it may associate with an unknown J-domain protein  
418 to recruit and bind onto ATF6, thus preventing its translocation into Golgi when ER stress is  
419 alleviated.

420

421         Our studies show that IRE1 $\alpha$  tightly associates with Sec61/Sec63 through luminal its  
422 juxtamembrane and transmembrane regions. Recent structural studies suggest that Sec63  
423 binding to the translocon sterically hinders the ribosome binding to the translocon (Wu et al.,  
424 2019; Itskanov and Park, 2019). Future studies are warranted to determine whether Sec63 is  
425 dissociated from the translocon when the ribosome-nascent chain complex is recruited to the  
426 Sec61/IRE1 $\alpha$  complex. Intriguingly, a recent study also shows that IRE1 $\alpha$  can directly bind to  
427 ribosomes (Acosta-Alvear et al., 2018), suggesting that IRE1 $\alpha$  forms an intricate complex with  
428 the Sec61 translocon-ribosome complex. Future structural and biochemical studies are needed  
429 to visualize this complex to understand how IRE1 $\alpha$  monitors and controls protein translocation  
430 into the ER.

431

432

## 433 **Materials and methods**

434

### 435 **Antibodies and Reagents.**

436 Many antibodies and reagents have been previously described (Plumb et al., 2015 and  
437 Sundaram et al., 2017). Rabbit anti-Sec61 $\alpha$ , anti-Sec62, anti-Sec63, and anti-HA antibodies,  
438 Sec62 siRNA, Sec63 siRNA were a generous gift from Dr. Ramanujan Hegde (Medical  
439 Research Council, UK). Antibodies purchased: anti-IRE1 $\alpha$  (3294, Cell Signaling, Danvers, MA,  
440 RRID:AB\_823545), anti-PERK (3192, Cell Signaling, RRID:AB\_2095847), anti-Tubulin

441 (ab7291, Abcam, Cambridge, UK, RRID:AB\_2241126), antiXBP1s (658802, BioLegend,  
442 RRID:AB\_2562960), anti-BiP (3177, Cell Signaling, Danvers, MA), anti-PERK (Cell Signaling  
443 #3192, RRID:AB\_2095847), anti-ATF6 $\alpha$  (Cell Signaling #65880), Anti-mouse Goat HRP (11-  
444 035-003, Jackson ImmunoResearch), anti-rabbit Goat HRP (111- 035-003, Jackson  
445 ImmunoResearch, RRID:AB\_2313567), anti-Rabbit Cy3 (711-165-152, Jackson Immuno  
446 Research). Resins were purchased: anti-HA magnetic beads (88836, Fisher Scientific,  
447 Waltham, MA), anti-FLAG (651503, Biolegend),  
448

449 Reagents purchased: DMEM (10–013-CV, Corning, Corning, NY), FBS (16000044,  
450 Gibco, Gaithersburg, MD), Horse Serum (H0146, Sigma, St Louis, MO), Penicillin/Streptomycin  
451 (15140122, Gibco, ), Lipofectamine 2000 (11668019, Invitrogen, Carlsbad, CA), Doxycycline  
452 (631311, Clontech, Mountain View, CA), Hygromycin (10687010, Invitrogen), Blasticidin  
453 (InvivoGen), Thapsigargin (BML-PE180-0005, Enzo Life Sciences, Farmingdale, New York),  
454 Protease inhibitor cocktail (11873580001, Roche), poly-L-lysine (OKK-3056, Peptides  
455 International), Digitonin (300410, EMD Millipore, Billerica, Massachusetts), Sec62 siRNA  
456 (68875, Qiagen), Sec63 siRNA (68711 and 68715, Qiagen), Fluoromount G (0100–01,  
457 SouthernBiotech, Birmingham, AL), Phos-tag (300–93523, Wako, Japan), SuperSignal West  
458 Pico or Femto Substrate (34080 or 34095, Thermo Scientific). All other common reagents were  
459 purchased as indicated in the method section.  
460  
461

#### 462 **DNA constructs,**

463 For mammalian cell expression, cDNAs were cloned into pcDNA5/FRT/TO (Invitrogen,  
464 Carlsbad, CA) (Plumb et al., 2015). Constructs encoding IRE1 $\alpha$ -HA and its mutants were  
465 previously described. The TMD of IRE1 $\alpha$  was replaced with calnexin TMD to create IRE1 $\alpha$ -  
466 CNX-TMD-HA using the protocol previously described (Volmer et al., 2013). Mouse Sec63  
467 plasmid was a kind gift from Dr. Stefan Somlo (Yale School of Medicine). Sec63 truncation  
468 constructs,  $\Delta$ 367-760,  $\Delta$ 637-760,  $\Delta$ 230-300, and  $\Delta$ 230-760, were made using phosphorylated  
469 primers with the Phusion Site-Directed Mutagenesis protocol. The tripeptide HPD in the J-  
470 domain was replaced with AAA to create the J-domain mutant of Sec63 using site-directed  
471 mutagenesis (Zheng et al., 2004). Rat BiP lacking the N-terminal signal sequence (1-18 amino  
472 acids) was cloned into pET-28a (+) using a standard cloning procedure. 3% DMSO was  
473 included in all PCR reactions to enhance amplification. The coding regions of all constructs  
474 were verified by sequencing performed in the Yale Keck DNA Sequencing Facility.  
475

#### 476 **Cell culture and stable cell lines**

477 HEK 293-Flp-In T-Rex cells (Invitrogen) were cultured in high glucose DMEM containing 10%  
478 FBS at 5% CO<sub>2</sub>. HEK293 IRE1 $\alpha$ -/- cells stably expressing IRE1 $\alpha$ -HA, IRE1 $\alpha$ -CNX-TMD-HA  
479 were generated as previously described (Plumb et al., 2015). HEK293 cells stably expressing  
480 2xStrep-IRE1 $\alpha$ -FLAG or 2xStrep-IRE1 $\alpha$   $\Delta$ 10-FLAG were previously described (Sundaram et al.,  
481 2017). To establish HEK293 Sec63-/- cells stably expressing either IRE1 $\alpha$  variants or Sec63  
482 variants were created by transfecting with 1.5 $\mu$ g of pOG44 vector (Invitrogen) and 0.5 $\mu$ g of FRT  
483 vectors containing IRE1 $\alpha$  or Sec63 using Lipofectamine 2000 (Invitrogen). After transfection,  
484 cells were plated in 150  $\mu$ g/ml hygromycin (Invitrogen) and 10  $\mu$ g/ml blasticidin (InvivoGen, San

485 Diego, CA). The medium was replaced every three days until colonies appeared. The colonies  
486 were picked and the protein expression was evaluated by immunoblotting. We have not tested  
487 the cell lines used in this study for the presence of mycoplasma, but many cell lines were used  
488 in immunofluorescence assays with Hoechst staining that should reveal presence of  
489 mycoplasma. The cells were assumed to be authenticated by their respective suppliers and  
490 were not further confirmed in this study. However, Sec63 knock out cell lines were verified by  
491 immunoblotting with anti-Sec63 antibodies.

492

#### 493 **CRISPR/Cas9-mediated knock out cell lines**

494 IRE1 $\alpha$ -/- HEK293-Flp-In T-Rex cells created by CRISPR/Cas9 were previously described  
495 (Plumb et al., 2015). The human Sec63 targeting sequence (5' GTGTATGTGGTATCGTTTA 3')  
496 or human Sec62 targeting sequence (5' AGTATCTTCGATTCAACTG 3') was cloned into the  
497 gRNA expression vector (Mali et al., 2013) in order to direct Cas9 nuclease activity. HEK 293-  
498 Flp-In T-Rex cells were plated in a six-well plate and transfected at 70% confluence with 500 ng  
499 of the gRNA expression vector and 500 ng of the pSpCas9(BB)-2A-Puro (Ran et al., 2013)  
500 plasmid with Lipofectamine 2000. Expression of Cas9 was selected by puromycin treatment (2.5  
501  $\mu$ g/ml) for 48 hr, after which cells were returned to non-selecting media for 72 hr. Cells were  
502 then plated at 0.5 cell/well in 96 well plates and expanded for 3 weeks. Individual clones were  
503 examined for Sec63 or Sec62 by immunoblotting.

504

#### 505 **Immunoprecipitations**

506 To test the interaction between IRE1 $\alpha$  and the Sec61 translocon complex, 0.8 million HEK 293  
507 cells were plated on a poly-L-lysine (0.1mg/ml) coated 6 well plate. The cells were transiently  
508 transfected with 2 $\mu$ g of HA-tagged or FLAG-tagged constructs using 5 $\mu$ l of lipofectamine 2000  
509 and treated with 100 ng/ml doxycycline unless otherwise indicated in the figure legends to  
510 induce protein expression. 24 hr after transfection, cells were harvested in 1xPBS and  
511 centrifuged for 2 min at 10,000g. The cell pellet was lysed in 200 $\mu$ l of Buffer A (50 mM Tris pH  
512 8.0, 150 mM NaCl, 5 mM MgAc) including 2% digitonin by incubating on ice for 30min. The 5%  
513 digitonin (EMD Millipore) stock was boiled for 5 min just before adding into Buffer A to avoid  
514 digitonin precipitating during IP. The supernatant was collected by centrifugation at 15,000g for  
515 15 min. For co-immunoprecipitation, the supernatant was rotated with 12 $\mu$ l anti-FLAG-agarose  
516 (Biolegend) or 15 $\mu$ l anti-HA magnetic beads (Thermo Scientific) for 1h 30min in the cold room.  
517 The beads were washed 3x with 1 ml of Buffer A including 0.1% digitonin. The bound material  
518 was eluted from the beads by directly boiling in 50  $\mu$ l of 2x SDS sample buffer for 5 min and  
519 analyzed by immunoblotting.

520 To test the interaction between BiP and IRE1 $\alpha$ , 0.8 million cells were plated on a 6 well  
521 plate and transiently transfected with 2 $\mu$ g of IRE1 $\alpha$  or its variants. The cells were washed and  
522 harvested in 1xPBS and centrifuged for 2 min at 10,000g. The cell pellet was lysed in either  
523 200 $\mu$ l of Buffer A including 2% digitonin or NP40 buffer (50 mM Tris, pH 7.5, 150 mM NaCl,  
524 0.5% deoxycholic acid, and 0.5% NP40). Apyrase (10 U/ml) and 10 mM CaCl<sub>2</sub> were included in  
525 both buffers and incubated for 30 min on ice. The cell lysate was centrifuged at 15,000g for 15  
526 min. The supernatant was incubated with anti-HA magnetic beads (Thermo Scientific) for 1h 30  
527 min in the cold room. The beads were washed 3 times with either 1ml of Buffer A including 0.1%  
528 digitonin or 1 ml of NP40 buffer and eluted by directly boiling in 50  $\mu$ l of 2x SDS sample buffer



529 for 5 min and analyzed by immunoblotting. In Figure 4B, HEK293 IRE1 $\alpha$ <sup>-/-</sup> cells complemented  
530 with IRE1 $\alpha$ -HA or IRE1 $\alpha$  CNX-TMD-HA were plated as above and induced with 1ng of  
531 Doxycycline for overnight. The cells were harvested, immunoprecipitated, and analyzed as  
532 above.

533

#### 534 **Purification of the IRE1 $\alpha$ /Sec61/Sec63 complex, IRE1 $\alpha$ $\Delta$ 10, and BiP**

535 The IRE1 $\alpha$ /Sec61/Sec63 complex and IRE1 $\alpha$  $\Delta$ 10 were purified as described previously  
536 (Sundaram et al., 2017). Briefly, microsomes were prepared from HEK293 cells stably  
537 expressing either 2xStrep IRE1 $\alpha$ -FLAG or 2xStrep IRE1 $\alpha$   $\Delta$ 10-FLAG as described previously.  
538 2ml of microsomes (OD280 = 50) were lysed with an equal volume of lysis buffer (50 mM Tris  
539 pH8, 600 mM NaCl, 5 mM MgCl<sub>2</sub>, 2% digitonin (boiled prior to use) 1x protease inhibitor cocktail  
540 and 10% glycerol) by incubating 30min on ice. The lysates were centrifuged at 25 000g for 25  
541 min at 4°C. Supernatant was collected and passed through a column packed with 1ml of  
542 compact StrepTactin beads (IBA, Germany) by gravity flow. Flow-through was collected and  
543 beads were washed with 6x 1ml of wash buffer (50 mM Tris pH 8.0, 150 mM NaCl, 5 mM  
544 MgCl<sub>2</sub>, 10% Glycerol and 0.1% digitonin). 2xStrep IRE1 $\alpha$  or IRE1 $\alpha$   $\Delta$ 10-FLAG was eluted from  
545 the beads using 20 mM desthiobiotin (EMD Millipore) included in the wash buffer. The  
546 desthiobiotin eluted material was further purified by passing through a cation exchange  
547 chromatography (SP Sepharose beads, GE Healthcare). Briefly beads were prepared in a 2 ml  
548 Bio-Rad column and washed 5x using no salt buffer (20 mM Tris pH 6.0, 2 mM MgAc and 0.4%  
549 DBC). Purified protein was diluted 5x with no salt buffer and pass-through the S-column. Beads  
550 were washed 5x column volume with no salt buffer and eluted with 500 mM NaCl buffer (50 mM  
551 Tris pH8, 2 mM MgAc, 10% glycerol, and 0.4% DBC). BiP that is bound to IRE1 $\alpha$  is mostly  
552 removed by this step because BiP does not bind to a cation exchange resin. Purified  
553 IRE1 $\alpha$ /Sec63/Sec61 or IRE1 $\alpha$   $\Delta$ 10 were subjected to coomassie staining and quantified using  
554 BSA standards (Sigma).

555

556 The pET-28a (+) plasmid encoding N-terminally 6X His-tagged rat BiP lacking the N-  
557 terminal signal sequence was expressed and purified from E. coli as described by Amin-Wetzel  
558 et al., 2017. Briefly, pET-28a (+) His-BiP was transformed into BL21 Rosetta (DE3) cells. The  
559 overnight culture of His-BiP was inoculated into fresh liquid LB and grown to OD600 of ~ 0.8 at  
560 37°C. The culture was cooled down to 18°C and induce with 0.5mM imidazole. After 16h  
561 induction, the cells were harvested and resuspended with buffer A (50 mM Tris pH7.4, 500 mM  
562 NaCl, 10% glycerol, 1 mM MgCl<sub>2</sub>, 0.2% (v/v) Triton X-100, 20 mM imidazole). The suspension  
563 was passed through the high-pressure homogenizer for 4 times. The lysate was spun at  
564 35000rpm for 40min at 4°C using Ti45 rotor. The supernatant was incubated with the  
565 prewashed 2mL of Ni-NTA beads and washed with 20ml of Buffer B (50 mM Tris pH 7.4, 500  
566 mM NaCl, 10% glycerol, 1 mM MgCl<sub>2</sub>, 0.2% (v/v) Triton X-100, 30 mM imidazole).  
567 Subsequently, the column was washed with 10ml of Buffer C (50 mM Tris pH 7.4, 1M NaCl,  
568 10% glycerol, 5 mM MgCl<sub>2</sub>, 1% (v/v) Triton X-100, 30 mM imidazole, 5mM ATP) and further  
569 washed with 10ml of Buffer D (50 mM Tris pH 7.4, 500 mM NaCl, 10% glycerol, 1 mM MgCl<sub>2</sub>,  
570 30 mM imidazole).The bound proteins were eluted with Buffer E (50 mM Tris pH 7.4, 500 mM  
571 NaCl, 10% glycerol, 1 mM MgCl<sub>2</sub>, 250 mM imidazole). The peak fractions containing BiP was



572 pooled and dialyzed against Buffer F (50 mM Tris pH 7.4, 150 mM NaCl, 10% glycerol, 5 mM  
573 MgCl<sub>2</sub>, 1mM CaCl<sub>2</sub>). The purified proteins were flash frozen and stored at -80°C.

574

#### 575 **In vitro reconstitution of Sec61/Sec63-mediated BiP binding to IRE1α**

576 IRE1α binding to BiP was adapted from Amin-Wetzel et al., 2017 with the following  
577 modifications. 12μl of Anti-FLAG beads was incubated with either 0.15μg of the 2X Strep-  
578 IRE1α-FLAG/Sec61/Sec63 complex or 0.15μg of 2X Strep-IRE1α Δ10-FLAG in 500ul of wash  
579 buffer (50 mM Tris pH 8.0, 150 mM NaCl, 10 mM MgCl<sub>2</sub>, 0.4% DBC) for 1h at 4°C. The beads  
580 were washed twice with 1ml of wash buffer. IRE1α bound beads were resuspended with 50ul of  
581 binding buffer (50 mM Tris pH 8.0, 150 mM NaCl, 10 mM MgCl<sub>2</sub>, 1mM CaCl<sub>2</sub>, 0.1% Triton X-  
582 100) including either BiP (1μg) and ATP (2mM). A negative control reaction was performed by  
583 incubating empty anti-FLAG beads with the buffer, BiP, and ATP. After incubation at 32°C for 30  
584 min, the beads were quickly washed with ice-cold wash buffer including 2mM ADP. The wash  
585 was repeated one more time with wash buffer excluding ADP. The bound proteins were eluted  
586 from beads 50μl of 2X SDS sample buffer and analyzed by immunoblotting. We used the  
587 following protocol to BiP binding to IRE1α in Figure 4 – figure supplement 2. 0.15μg of the 2X  
588 Strep-IRE1α-FLAG/Sec61/Sec63 complex or 0.15μg of 2X Strep-IRE1α Δ10-FLAG was  
589 incubated with and without 5μg BiP in 50ul of binding buffer (50 mM Tris pH 8.0, 100 mM NaCl,  
590 10 mM MgCl<sub>2</sub>, 1mM CaCl<sub>2</sub>, 2mM ATP, 0.2% DBC) for 30min at 32°C. A negative control  
591 reaction was performed by mixing the buffer, BiP, and ATP. The reactions were terminated by  
592 diluting with ice-cold NP40 buffer (50 mM Tris, pH 7.5, 150 mM NaCl, 0.5% deoxycholic acid,  
593 and 0.5% NP40) and incubated with 12μl of anti-FLAG beads for 1h 30min at 4°C. After  
594 incubation, the beads were washed twice with 1ml of NP40 buffer. The bound proteins were  
595 eluted by boiling beads with 50μl of SDS sample buffer and analyzed by immunoblotting.

596

#### 597 **Immunofluorescence**

598 HEK293 IRE1α<sup>-/-</sup> cells stably complemented with IRE1α-HA (0.12 X 10<sup>6</sup>) were plated on 12 mm  
599 round glass coverslips (Fisher Scientific) coated with 0.1 mg/mL poly-lysine for 5 hr in 24-well  
600 plates. For Figure 2A, the cells expressing IRE1α-HA were transfected with either 20 pmole of  
601 Sec62 siRNA or Sec63 siRNA using 2μl of lipofectamine 2000 and induced with 5ng/ml of  
602 doxycycline to induce IRE1α expression. After 30 hr of transfection, cells were treated with 5  
603 μg/ml of thapsigargin (Tg) for 1.5 h before fixing and immunostaining as described previously  
604 (Sundaram et al., 2017). For Figure 2D, HEK293 IRE1α<sup>-/-</sup> cells stably expressing either WT  
605 IRE1α-HA or IRE1α CNX-TMD-HA were induced with 5ng/ml doxycycline and treated with 5  
606 μg/ml of Tm or Tg for the indicated time points. The treated cells were fixed and processed for  
607 immunostaining. For Figure 2F, the cells expressing IRE1α-HA were transfected with 0.1μg of  
608 Sec63 or Sec63 HPD/AAA using 1μl of lipofectamine 2000. IRE1α expression was induced with  
609 doxycycline (5ng/ml) for 16 hr before treatment with 5 μg/ml Tg for 1.5 h followed by fixed and  
610 immunostained with anti-HA antibodies for IRE1α. The cells were imaged on Leica scanning  
611 confocal microscope and IRE1α clusters were quantified as previously described (Sundaram et  
612 al., 2017) with the following modifications. For each condition, we randomly chose at least 10  
613 fields-of-view and took images. First, we identified the total number of cells per frame by  
614 manually counting Hoechst-stained nuclei. We counted more than 300 cells from the 10 images

615 of each condition and looked for cells with IRE1 $\alpha$  clusters. Of those cells, we calculated the  
616 percentage of cells with IRE1 $\alpha$  clusters. Data was graphed using GraphPad Prism and  
617 represented with standard error of the mean from two independent experiments.

618

### 619 **XBP1 mRNA splicing assay**

620 Total RNA was extracted from cells using Trizol reagent (Ambion) according to the  
621 manufactures protocol. 2 $\mu$ g of total RNA was treated with 1U/ul DNase I (Promega). 0.5 $\mu$ g of  
622 DNase-treated RNA was reverse transcribed into cDNA using Oligo(dT)20 primer (Qiagen) and  
623 M-MLUV reverse transcriptase (NEB). cDNA was amplified by standard PCR with TaqDNA  
624 polymerase using the primers: 5'-AAACAGAGTAGCAGCTCAGACTGC -3', 5'-  
625 TCCTTCTGGGTAGACCTCTGGGAG -3' (Calfon et al., 2002). PCR products of XBP1 were  
626 resolved by 2% agarose gel and stained with ethidium bromide. The intensities of DNA bands  
627 were quantified on image analyzer (Image J, NIH).

628

### 629 **Phostag-based immunoblotting**

630 Typically, 0.15 X 10<sup>6</sup> cells were plated on 24 well poly-lysine coated plates. The following day,  
631 cells were treated with 5 $\mu$ g/ml Tg for various time points indicated in Figure 3. The cells were  
632 directly harvested in 100 ul of 2X sample buffer and boiled for 5 to 10 minutes. IRE1 $\alpha$   
633 phosphorylation was detected by the previously described method (Yang et al., 2010). Briefly,  
634 5% SDS PAGE gel was made using 25  $\mu$ M Phos-tag (Wako). SDS-PAGE was run at 100 V for  
635 2 hr and 30 min. The gel was transferred to nitrocellulose (Bio-Rad, Hercules, CA) and followed  
636 with immunoblotting. The intensities of the Phos-tag bands were quantified on image analyzer  
637 (Image J, NIH). To probe the phosphorylation of PERK, the samples were run on a 7.5%  
638 Tris/Tricine gel for 2 h and 30 min and transferred to nitrocellulose membrane and blotted using  
639 a standard procedure.

640

### 641 **Acknowledgments**

642 We thank Dr. Ramanujan Hegde for Sec62 and Sec63 antibodies, and Dr. Stefan Somlo for  
643 mouse Sec63 plasmid. We thank Jacob Culver for useful discussion and comments on the  
644 manuscript. This work is funded by NIH grants R01GM117386 (M.M) and R21AG056800 (M.M).

645

### 646 **References**

647

648 Acosta-Alvear, D., G.E. Karagoz, F. Frohlich, H. Li, T.C. Walther, and P. Walter. 2018. The  
649 unfolded protein response and endoplasmic reticulum protein targeting machineries converge  
650 on the stress sensor IRE1 $\alpha$ . *Elife*. 7.

651

652 Adamson, B., T.M. Norman, M. Jost, M.Y. Cho, J.K. Nunez, Y. Chen, J.E. Villalta, L.A. Gilbert,  
653 M.A. Horlbeck, M.Y. Hein, R.A. Pak, A.N. Gray, C.A. Gross, A. Dixit, O. Parnas, A. Regev, and  
654 J.S. Weissman. 2016. A Multiplexed Single-Cell CRISPR Screening Platform Enables  
655 Systematic Dissection of the Unfolded Protein Response. *Cell*. 167:1867-1882 e1821.

656

657 Alder, N.N., Y. Shen, J.L. Brodsky, L.M. Hendershot, and A.E. Johnson. 2005. The molecular  
658 mechanisms underlying BiP-mediated gating of the Sec61 translocon of the endoplasmic  
659 reticulum. *J Cell Biol.* 168:389-399.

660

661 Amin-Wetzel, N., R.A. Saunders, M.J. Kamphuis, C. Rato, S. Preissler, H.P. Harding, and D.  
662 Ron. 2017. A J-Protein Co-chaperone Recruits BiP to Monomerize IRE1 $\alpha$  and Repress the  
663 Unfolded Protein Response. *Cell.* 171:1625-1637 e1613.

664

665 Back, S.H., and R.J. Kaufman. 2012. Endoplasmic reticulum stress and type 2 diabetes. *Annu*  
666 *Rev Biochem.* 81:767-793.

667

668 Bertolotti, A., Y. Zhang, L.M. Hendershot, H.P. Harding, and D. Ron. 2000. Dynamic interaction  
669 of BiP and ER stress transducers in the unfolded-protein response. *Nat Cell Biol.* 2:326-332.

670 Brodsky, J.L. 2012. Cleaning up: ER-associated degradation to the rescue. *Cell.* 151:1163-  
671 1167.

672

673 Brodsky, J.L., J. Goeckeler, and R. Schekman. 1995. BiP and Sec63p are required for both co-  
674 and posttranslational protein translocation into the yeast endoplasmic reticulum. *Proc Natl Acad*  
675 *Sci U S A.* 92:9643-9646.

676

677 Calfon, M., H. Zeng, F. Urano, J.H. Till, S.R. Hubbard, H.P. Harding, S.G. Clark, and D. Ron.  
678 2002. IRE1 $\alpha$  couples endoplasmic reticulum load to secretory capacity by processing the XBP-1  
679 mRNA. *Nature.* 415:92-96.

680

681 Carrara, M., F. Prischi, P.R. Nowak, M.C. Kopp, and M.M. Ali. 2015. Noncanonical binding of  
682 BiP ATPase domain to Ire1 and Perk is dissociated by unfolded protein CH1 to initiate ER  
683 stress signaling. *Elife.* 4.

684

685 Conti, B.J., P.K. Devaraneni, Z. Yang, L.L. David, and W.R. Skach. 2015. Cotranslational  
686 stabilization of Sec62/63 within the ER Sec61 translocon is controlled by distinct substrate-  
687 driven translocation events. *Mol Cell.* 58:269-283.

688

689 Cox, J.S., C.E. Shamu, and P. Walter. 1993. Transcriptional induction of genes encoding  
690 endoplasmic reticulum resident proteins requires a transmembrane protein kinase. *Cell.*  
691 73:1197-1206.

692

693 Cubillos-Ruiz, J.R., S.E. Bettigole, and L.H. Glimcher. 2017. Tumorigenic and  
694 Immunosuppressive Effects of Endoplasmic Reticulum Stress in Cancer. *Cell.* 168:692-706.

695

696 Deshaies, R.J., S.L. Sanders, D.A. Feldheim, and R. Schekman. 1991. Assembly of yeast Sec  
697 proteins involved in translocation into the endoplasmic reticulum into a membrane-bound  
698 multisubunit complex. *Nature.* 349:806-808.

699

700 Eletto, D., D. Eletto, D. Dersh, T. Gidalevitz, and Y. Argon. 2014. Protein disulfide isomerase A6  
701 controls the decay of IRE1 $\alpha$  signaling via disulfide-dependent association. *Mol Cell*.  
702 53:562-576.  
703  
704 Ghosh, R., L. Wang, E.S. Wang, B.G. Perera, A. Igbaria, S. Morita, K. Prado, M. Thamsen, D.  
705 Caswell, H. Macias, K.F. Weiberth, M.J. Gliedt, M.V. Alavi, S.B. Hari, A.K. Mitra, B. Bhatarai,  
706 S.C. Schurer, E.L. Snapp, D.B. Gould, M.S. German, B.J. Backes, D.J. Maly, S.A. Oakes, and  
707 F.R. Papa. 2014. Allosteric inhibition of the IRE1 $\alpha$  RNase preserves cell viability and  
708 function during endoplasmic reticulum stress. *Cell*. 158:534-548.  
709  
710 Han, D., A.G. Lerner, L. Vande Walle, J.P. Upton, W. Xu, A. Hagen, B.J. Backes, S.A. Oakes,  
711 and F.R. Papa. 2009. IRE1 $\alpha$  kinase activation modes control alternate endoribonuclease  
712 outputs to determine divergent cell fates. *Cell*. 138:562-575.  
713  
714 Harding, H.P., Y. Zhang, and D. Ron. 1999. Protein translation and folding are coupled by an  
715 endoplasmic-reticulum-resident kinase. *Nature*. 397:271-274.  
716  
717 Haze, K., H. Yoshida, H. Yanagi, T. Yura, and K. Mori. 1999. Mammalian transcription factor  
718 ATF6 is synthesized as a transmembrane protein and activated by proteolysis in response to  
719 endoplasmic reticulum stress. *Mol Biol Cell*. 10:3787-3799.  
720  
721 Hetz, C. 2012. The unfolded protein response: controlling cell fate decisions under ER stress  
722 and beyond. *Nat Rev Mol Cell Biol*. 13:89-102.  
723  
724 Hollien, J., and J.S. Weissman. 2006. Decay of endoplasmic reticulum-localized mRNAs during  
725 the unfolded protein response. *Science*. 313:104-107.  
726  
727 Ishikawa, Y., S. Fedeles, A. Marlier, C. Zhang, A.R. Gallagher, A.H. Lee, and S. Somlo. 2019.  
728 Spliced XBP1 Rescues Renal Interstitial Inflammation Due to Loss of Sec63 in Collecting Ducts.  
729 *J Am Soc Nephrol*.  
730  
731 Itskanov, S., and E. Park. 2019. Structure of the posttranslational Sec protein-translocation  
732 channel complex from yeast. *Science*. 363:84-87.  
733  
734 Jurkin, J., T. Henkel, A.F. Nielsen, M. Minnich, J. Popow, T. Kaufmann, K. Heindl, T. Hoffmann,  
735 M. Busslinger, and J. Martinez. 2014. The mammalian tRNA ligase complex mediates splicing  
736 of XBP1 mRNA and controls antibody secretion in plasma cells. *EMBO J*. 33:2922-2936.  
737  
738 Kopp, M.C., P.R. Nowak, N. Larburu, C.J. Adams, and M.M. Ali. 2018. In vitro FRET analysis of  
739 IRE1 $\alpha$  and BiP association and dissociation upon endoplasmic reticulum stress. *Elife*. 7.  
740  
741 Kosmaczewski, S.G., T.J. Edwards, S.M. Han, M.J. Eckwahl, B.I. Meyer, S. Peach, J.R.  
742 Hesselberth, S.L. Wolin, and M. Hammarlund. 2014. The RtcB RNA ligase is an essential  
743 component of the metazoan unfolded protein response. *EMBO Rep*. 15:1278-1285.

744  
745 Kulak, N.A., G. Pichler, I. Paron, N. Nagaraj, and M. Mann. 2014. Minimal, encapsulated  
746 proteomic-sample processing applied to copy-number estimation in eukaryotic cells. *Nat*  
747 *Methods*. 11:319-324.  
748  
749 Lee, A.H., N.N. Iwakoshi, and L.H. Glimcher. 2003. XBP-1 regulates a subset of endoplasmic  
750 reticulum resident chaperone genes in the unfolded protein response. *Mol Cell Biol*. 23:7448-  
751 7459.  
752  
753 Li, H., A.V. Korennykh, S.L. Behrman, and P. Walter. 2010. Mammalian endoplasmic reticulum  
754 stress sensor IRE1 $\alpha$  signals by dynamic clustering. *Proc Natl Acad Sci U S A*. 107:16113-  
755 16118.  
756  
757 Lin, J.H., H. Li, D. Yasumura, H.R. Cohen, C. Zhang, B. Panning, K.M. Shokat, M.M. Lavail, and  
758 P. Walter. 2007. IRE1 $\alpha$  signaling affects cell fate during the unfolded protein response. *Science*.  
759 318:944-949.  
760  
761 Lu, Y., F.X. Liang, and X. Wang. 2014. A synthetic biology approach identifies the mammalian  
762 UPR RNA ligase RtcB. *Mol Cell*. 55:758-770.  
763  
764 Mali, P., L. Yang, K.M. Esvelt, J. Aach, M. Guell, J.E. DiCarlo, J.E. Norville, and G.M. Church.  
765 2013. RNA-guided human genome engineering via Cas9. *Science*. 339:823-826.  
766 Meyer, H.A., H. Grau, R. Kraft, S. Kostka, S. Prehn, K.U. Kalies, and E. Hartmann. 2000.  
767 Mammalian Sec61 is associated with Sec62 and Sec63. *J Biol Chem*. 275:14550-14557.  
768  
769 Misselwitz, B., O. Staeck, and T.A. Rapoport. 1998. J proteins catalytically activate Hsp70  
770 molecules to trap a wide range of peptide sequences. *Mol Cell*. 2:593-603.  
771  
772 Mori, K., W. Ma, M.J. Gething, and J. Sambrook. 1993. A transmembrane protein with a  
773 cdc2+/CDC28-related kinase activity is required for signaling from the ER to the nucleus. *Cell*.  
774 74:743-756.  
775  
776 Okamura, K., Y. Kimata, H. Higashio, A. Tsuru, and K. Kohno. 2000. Dissociation of Kar2p/BiP  
777 from an ER sensory molecule, Ire1p, triggers the unfolded protein response in yeast. *Biochem*  
778 *Biophys Res Commun*. 279:445-450.  
779  
780 Panzner, S., L. Dreier, E. Hartmann, S. Kostka, and T.A. Rapoport. 1995. Posttranslational  
781 protein transport in yeast reconstituted with a purified complex of Sec proteins and Kar2p. *Cell*.  
782 81:561-570.  
783  
784 Pincus, D., M.W. Chevalier, T. Aragon, E. van Anken, S.E. Vidal, H. El-Samad, and P. Walter.  
785 2010. BiP binding to the ER-stress sensor Ire1 tunes the homeostatic behavior of the unfolded  
786 protein response. *PLoS Biol*. 8:e1000415.  
787



788 Plumb, R., Z.R. Zhang, S. Appathurai, and M. Mariappan. 2015. A functional link between the  
789 co-translational protein translocation pathway and the UPR. *Elife*. 4.  
790  
791 Pobre, K.F.R., G.J. Poet, and L.M. Hendershot. 2019. The endoplasmic reticulum (ER)  
792 chaperone BiP is a master regulator of ER functions: Getting by with a little help from ERdj  
793 friends. *J Biol Chem*. 294:2098-2108.  
794  
795 Poothong, J., W. Tirasophon, and R.J. Kaufman. 2017. Functional analysis of the mammalian  
796 RNA ligase for IRE1 $\alpha$  in the unfolded protein response. *Biosci Rep*. 37.  
797  
798 Preissler, S., and D. Ron. 2019. Early Events in the Endoplasmic Reticulum Unfolded Protein  
799 Response. *Cold Spring Harb Perspect Biol*. 11.  
800  
801 Ran, F.A., P.D. Hsu, J. Wright, V. Agarwala, D.A. Scott, and F. Zhang. 2013. Genome  
802 engineering using the CRISPR-Cas9 system. *Nat Protoc*. 8:2281-2308.  
803  
804 Rapoport, T.A. 2007. Protein translocation across the eukaryotic endoplasmic reticulum and  
805 bacterial plasma membranes. *Nature*. 450:663-669.  
806  
807 Ricci, D., I. Marrocco, D. Blumenthal, M. Dibos, D. Eletto, J. Vargas, S. Boyle, Y.  
808 Iwamoto, S. Chomistek, J.C. Paton, A.W. Paton, and Y. Argon. 2019. Clustering of  
809 IRE1 $\alpha$  alpha depends on sensing ER stress but not on its RNase activity. *Faseb*  
810 *Journal*. 33:9811-9827.  
811  
812 Sepulveda, D., D. Rojas-Rivera, D.A. Rodriguez, J. Groenendyk, A. Kohler, C. Lebeaupin, S.  
813 Ito, H. Urrea, A. Carreras-Sureda, Y. Hazari, M. Vasseur-Cognet, M.M.U. Ali, E. Chevet, G.  
814 Campos, P. Godoy, T. Vaisar, B. Bailly-Maitre, K. Nagata, M. Michalak, J. Sierralta, and C.  
815 Hetz. 2018. Interactome Screening Identifies the ER Luminal Chaperone Hsp47 as a Regulator  
816 of the Unfolded Protein Response Transducer IRE1 $\alpha$ alpha. *Mol Cell*. 69:238-252 e237.  
817  
818 Shao, S., and R.S. Hegde. 2011. Membrane protein insertion at the endoplasmic reticulum.  
819 *Annu Rev Cell Dev Biol*. 27:25-56.  
820  
821 Shoulders, M.D., L.M. Ryno, J.C. Genereux, J.J. Moresco, P.G. Tu, C. Wu, J.R. Yates, 3rd, A.I.  
822 Su, J.W. Kelly, and R.L. Wiseman. 2013. Stress-independent activation of XBP1s and/or ATF6  
823 reveals three functionally diverse ER proteostasis environments. *Cell Rep*. 3:1279-1292.  
824  
825 Sood, R., A.C. Porter, K. Ma, L.A. Quilliam, and R.C. Wek. 2000. Pancreatic eukaryotic initiation  
826 factor-2 $\alpha$  kinase (PEK) homologues in humans, *Drosophila melanogaster* and  
827 *Caenorhabditis elegans* that mediate translational control in response to endoplasmic reticulum  
828 stress. *Biochem J*. 346 Pt 2:281-293.  
829

- 830 Sundaram, A., S. Appathurai, R. Plumb, and M. Mariappan. 2018. Dynamic changes in  
831 complexes of IRE1 $\alpha$ , PERK, and ATF6 $\alpha$  during endoplasmic reticulum stress. *Mol Biol*  
832 *Cell*. 29:1376-1388.
- 833
- 834 Sundaram, A., R. Plumb, S. Appathurai, and M. Mariappan. 2017. The Sec61 translocon limits  
835 IRE1 $\alpha$  signaling during the unfolded protein response. *Elife*. 6.
- 836
- 837 van Anken, E., and I. Braakman. 2005. Versatility of the endoplasmic reticulum protein folding  
838 factory. *Crit Rev Biochem Mol Biol*. 40:191-228.
- 839
- 840 Volmer, R., K. van der Ploeg, and D. Ron. 2013. Membrane lipid saturation activates  
841 endoplasmic reticulum unfolded protein response transducers through their transmembrane  
842 domains. *Proc Natl Acad Sci U S A*. 110:4628-4633.
- 843
- 844 Walter, P., and D. Ron. 2011. The unfolded protein response: from stress pathway to  
845 homeostatic regulation. *Science*. 334:1081-1086.
- 846
- 847 Wang, M., and R.J. Kaufman. 2016. Protein misfolding in the endoplasmic reticulum as a  
848 conduit to human disease. *Nature*. 529:326-335.
- 849
- 850 Wu, X., C. Cabanos, and T.A. Rapoport. 2019. Structure of the post-translational protein  
851 translocation machinery of the ER membrane. *Nature*. 566:136-139.
- 852
- 853 Yang, L., Z. Xue, Y. He, S. Sun, H. Chen, and L. Qi. 2010. A Phos-tag-based approach reveals  
854 the extent of physiological endoplasmic reticulum stress. *PLoS One*. 5:e11621.
- 855
- 856 Ye, J., R.B. Rawson, R. Komuro, X. Chen, U.P. Dave, R. Prywes, M.S. Brown, and J.L.  
857 Goldstein. 2000. ER stress induces cleavage of membrane-bound ATF6 by the same proteases  
858 that process SREBPs. *Mol Cell*. 6:1355-1364.
- 859
- 860 Yoshida, H., T. Matsui, A. Yamamoto, T. Okada, and K. Mori. 2001. XBP1 mRNA is induced by  
861 ATF6 and spliced by IRE1 $\alpha$  in response to ER stress to produce a highly active transcription  
862 factor. *Cell*. 107:881-891.
- 863
- 864 Young, B.P., R.A. Craven, P.J. Reid, M. Willer, and C.J. Stirling. 2001. Sec63p and Kar2p are  
865 required for the translocation of SRP-dependent precursors into the yeast endoplasmic  
866 reticulum in vivo. *EMBO J*. 20:262-271.
- 867
- 868 Zheng, L., U. Baumann, and J.L. Reymond. 2004. An efficient one-step site-directed and site-  
869 saturation mutagenesis protocol. *Nucleic Acids Res*. 32:e115.

870  
871  
872  
873

## Figure Legends

874

875 **Figure 1. The Sec61 translocon bridges the interaction between IRE1 $\alpha$  and Sec63**

876 (1) A diagram showing the Sec61 translocon interaction region in IRE1 $\alpha$ . Triangle depicts amino  
877 acid residues of IRE1 $\alpha$  that are important for the interaction with the Sec61 translocon (Plumb et  
878 al., 2015). (B) The cell lysates of the indicated versions of HA-tagged IRE1 $\alpha$  were  
879 immunoprecipitated using an anti-HA antibody, eluted with sample buffer, and analyzed by  
880 immunoblotting. IRE1 $\alpha$   $\Delta$ 10 lacks amino acids 434 to 443 in human IRE1 $\alpha$ . IRE1 $\alpha$  VD/AA, L/A,  
881 and M/A are mutations within the 10-amino acid region shown in panel A. The TMD of IRE1 $\alpha$  is  
882 replaced with the TMD of calnexin in the IRE1 $\alpha$  CNX-TMD construct. (C) HEK293 or HEK293  
883 Sec63<sup>-/-</sup> cells were transfected with either wild type IRE1 $\alpha$ -HA or IRE1 $\alpha$   $\Delta$ 10-HA and  
884 immunoprecipitated using an anti-HA antibody and eluted with sample buffer. The  
885 immunoprecipitates were analyzed by immunoblotting for the indicated antigens. The amount of  
886 IRE1 $\alpha$  bound to Sec61 $\alpha$  was taken as 100%. (D) The cell lysates from FLAG-tagged wild type  
887 (WT) Sec63, the J-domain mutant, and  $\Delta$ 230-300 were immunoprecipitated using an anti-FLAG  
888 antibody and immunoblotted for the indicated antigens. (E) Sec63<sup>-/-</sup> cells complemented with  
889 Sec63-FLAG were either treated with DMSO, 5 $\mu$ g/ml thapsigargin (Tg) or 5 $\mu$ g/ml tunicamycin  
890 (Tm) for 4h. The DTT treatment was done with 4mM for either 4h or 8h. Sec63 was  
891 immunoprecipitated from these cell lysates and immunoblotted for the indicated antigens. The  
892 amount of IRE1 $\alpha$  bound to Sec63 from DMSO treated sample was set as 100%. The  
893 percentage of IRE1 $\alpha$  bound to Sec63 upon Tg, Tm, or DTT treated sample was calculated with  
894 respect to the DMSO treated sample.

895

896 **Figure 1 – figure supplement 1. IRE1 $\alpha$  interacts with Sec63 through the Sec61 translocon**

897 (A) A diagram showing the topology of Sec63. (B) The cell lysates of the indicated versions of  
898 FLAG-tagged Sec63 were immunoprecipitated with anti-FLAG beads and analyzed by  
899 immunoblotting for the indicated antigens. The HPD tripeptide in the J-domain was replaced  
900 with AAA to create the J-domain mutant of Sec63.

901

902 **Figure 2. Sec63 inhibits IRE1 $\alpha$  clustering during ER stress in cells.**

903 (A) HEK293 IRE1 $\alpha$ <sup>-/-</sup> cells complemented with IRE1 $\alpha$ -HA were transfected with either control,  
904 Sec63, or Sec62 siRNA. The expression of IRE1 $\alpha$ -HA was induced with 5ng/ml doxycycline.  
905 After 30h of transfection, the cells were either left untreated or treated with 5 $\mu$ g/ml Tg for 1.5h  
906 and processed for immunostaining with anti-HA antibodies for IRE1 $\alpha$ . Scale bars are 10  $\mu$ m. (B)  
907 Quantification of the number of cells with IRE1 $\alpha$  clusters from the panel A. Error bar represents  
908 standard deviation (n=2). (C) HEK293 IRE1 $\alpha$ <sup>-/-</sup> cells were treated with the indicated siRNAs.  
909 After 30h of transfection, the cells were harvested and analyzed by immunoblotting for the  
910 indicated antigens. (D) HEK293 IRE1 $\alpha$ <sup>-/-</sup> cells expressing either IRE1 $\alpha$ -HA or IRE1 $\alpha$ -CNX-TMD-  
911 HA were induced with 5ng/ml doxycycline and treated with either Tg or Tm for the indicated time  
912 points. The cells were then processed for immunostaining as in A. (E) The number of cells with  
913 IRE1 $\alpha$  clusters were quantified from the panel D. Error bar represents standard deviation (n=2).  
914 (F) HEK293 IRE1 $\alpha$ <sup>-/-</sup> cells expressing IRE1 $\alpha$ -HA were transfected with either empty vector, wild  
915 type (WT) Sec63 or the J-domain mutant of Sec63. The expression of IRE1 $\alpha$ -HA was induced  
916 with 5ng/ml doxycycline. After 24h of transfection, the cells were either left untreated or treated  
917 with 5 $\mu$ g/ml Tg for 1.5h and subsequently processed for immunostaining with anti-HA antibodies

918 for IRE1 $\alpha$ . (G) Quantification of the number of cells with IRE1 $\alpha$  clusters from the panel F. Error  
919 bar represents standard deviation (n=2) (H) The cells were transfected as in the panel F, but  
920 analyzed by immunoblotting for the indicated antigens.

921

922 **Figure 3. The J domain of Sec63 is essential for attenuating IRE1 $\alpha$  activity during ER**  
923 **stress in cells.**

924 (A) Wild type HEK293 or Sec63<sup>-/-</sup> cells were treated with 5 $\mu$ g/ml of Tg for the indicated time  
925 points and analyzed by immunoblotting as well as the XBP1 mRNA splicing assay. p-IRE1 $\alpha$   
926 denotes the phosphorylated form of IRE1 $\alpha$ , which migrates slower in the phos-tag  
927 immunoblotting. The percentage of IRE1 $\alpha$  phosphorylation is shown underneath phos-tag  
928 immunoblots. The percentage of spliced XBP1 mRNA is shown underneath agarose gels.  
929 XBP1<sub>u</sub> - Unspliced XBP1 mRNA, XBP1<sub>s</sub> - spliced XBP1 mRNA. (B) Sec63<sup>-/-</sup> cells  
930 complemented with either WT or the J-domain mutant of IRE1 $\alpha$  were treated and analyzed as in  
931 the panel A. (C) HEK293 IRE1 $\alpha$ <sup>-/-</sup> cells stably complemented with either WT IRE1 $\alpha$  or IRE1 $\alpha$ -  
932 CNX-TMD were treated with 5 $\mu$ g/ml of Tg for the indicated time points and analyzed by  
933 immunoblots as well as the XBP1 mRNA splicing assay.

934

935 **Figure 3 – figure supplement 1: Sec63 but not Sec62 is required for attenuating IRE1 $\alpha$**   
936 **RNase activity during ER stress.**

937 (A) HEK293 cells were treated with either control, Sec62, or Sec63 siRNA for the indicated time  
938 points and analyzed by immunoblotting for the indicated antigens. IRE1 $\alpha$  phosphorylation was  
939 probed by phos-tag-based immunoblotting. The percentage of IRE1 $\alpha$  phosphorylation is shown  
940 underneath phos-tag immunoblots. (B) Wild type HEK293 or Sec63<sup>-/-</sup> cells were treated with  
941 5 $\mu$ g/ml of Tm for the indicated time points and analyzed by immunoblotting for the indicated  
942 antigens. (C) Sec63<sup>-/-</sup> cells complemented with either WT or the J-domain mutant of IRE1 $\alpha$   
943 were treated with 5 $\mu$ g/ml of Tg for the indicated time points and analyzed by immunoblotting.  
944 The percentage of IRE1 $\alpha$  phosphorylation is shown underneath phos-tag immunoblots. (D)  
945 HEK293 or Sec63<sup>-/-</sup> cells were transiently transfected with the indicated versions of Sec63 and  
946 treated with 5 $\mu$ g/ml of Tg for the indicated time points. The treated cells were directly harvested  
947 in SDS sample buffer and analyzed by immunoblotting for the indicated antigens. (E) Wild type  
948 HEK293 or Sec62<sup>-/-</sup> cells were treated with 5 $\mu$ g/ml of Tg for the indicated time points and  
949 analyzed by the immunoblotting for the indicated antigens.

950

951

952 **Figure 3 – figure supplement 2. The effects of Sec63 depletion on activation of PERK and**  
953 **ATF6 during ER stress.**

954 (A) The samples from Figure 3A were analyzed by immunoblotting for the indicated antigens.  
955 (B) The samples from Figure 3B were analyzed by immunoblotting for the indicated antigens.  
956 (C) HEK293 or Sec63<sup>-/-</sup> cells were treated with DTT for the indicated time points with the  
957 indicated concentrations. The cells were directly harvested in SDS sample buffer and analyzed  
958 by immunoblotting for the indicated antigens.

959

960 **Figure 4. Biochemical reconstitution of Sec61/Sec63-mediated BiP binding to IRE1 $\alpha$ .**

961 (A) HEK293 cells were transiently transfected with either IRE1 $\alpha$ -HA or its variants and  
962 immunoprecipitated using an anti-HA antibody and analyzed by immunoblotting. BiP binding to  
963 wild type IRE1 $\alpha$  was set as 100%, and the percentage of BiP binding to IRE1 $\alpha$  mutants were  
964 calculated with respect to wild type IRE1 $\alpha$ . (B) HEK293 IRE1 $\alpha$ -/- cells stably expressing IRE1 $\alpha$ -  
965 HA or IRE1 $\alpha$ -CNX-TMD-HA were treated with DMSO for 2h, 4mM DTT for 2h, 10 $\mu$ g/ml Tg for  
966 2h, or 5 $\mu$ g/ml TM for 4h. The treated cells were harvested and analyzed as in A. The amount of  
967 Sec63 bound to wild type IRE1 $\alpha$  from DMSO treated sample was set as 100%. The percentage  
968 of Sec63 bound IRE1 $\alpha$  upon DTT, Tg, or Tm treated sample was calculated with respect to wild  
969 type IRE1 $\alpha$  treated with DMSO. (C) A coomassie blue stained gel showing the purified  
970 IRE1 $\alpha$ /Sec61/Sec63 complex or IRE1 $\alpha$  $\Delta$ 10 from HEK293 cells stably expressing either 2xStrep-  
971 IRE1 $\alpha$ -FLAG or 2xStrep-IRE1 $\alpha$   $\Delta$ 10-FLAG. (D) A coomassie blue stained gel showing purified  
972 His-BiP from E. coli. (E) The purified IRE1 $\alpha$ /Sec61/Sec63 complex, IRE1 $\alpha$  $\Delta$ 10 was bound to  
973 anti-FLAG beads and incubated with or without BiP in the presence or absence of ATP as  
974 shown. After incubation, IRE1 $\alpha$  bound anti-FLAG beads were washed, eluted with sample  
975 buffer. A negative control reaction was performed by incubating empty anti-FLAG beads with  
976 the buffer, BiP, and ATP. The samples were analyzed by immunoblotting for the indicated  
977 antigens. BiP bands were quantified and presented as arbitrary units (a.u) after subtracting the  
978 buffer background.  
979

#### 980 **Figure 4 – figure supplement 1. Sec61/Sec63-mediated BiP binding to IRE1 $\alpha$ .**

981 (A, B) HEK293 Sec63-/- cells complemented with wild type Sec63 were transiently transfected  
982 with either IRE1 $\alpha$ -HA or its variants. The cell lysates were prepared either using the buffer  
983 containing NP40/deoxycholate or digitonin, followed by immunoprecipitation with an anti-HA  
984 antibody and analyzed by immunoblotting for the indicated antigens. (C) HEK293 cells were co-  
985 transfected with IRE1 $\alpha$ -HA and empty vector or Sec63-FLAG or J-domain mutant of Sec63-  
986 FLAG. The cell lysates were immunoprecipitated with an anti-HA antibody and analyzed by  
987 immunoblotting for the indicated antigens. The amount of BiP binding to IRE1 $\alpha$  that was co-  
988 transfected with empty vector was taken as 100%. (D) The purified IRE1 $\alpha$ /Sec61/Sec63  
989 complex or IRE1 $\alpha$  $\Delta$ 10 was incubated with or without BiP in the presence ATP. After incubation,  
990 IRE1 $\alpha$  was immunoprecipitated using anti-FLAG beads. A negative control reaction was  
991 performed by mixing the buffer, BiP, and ATP, followed by immunoprecipitation with anti-FLAG  
992 beads. The samples were analyzed by immunoblotting for the indicated antigens. Note that  
993 IRE1 $\alpha$  $\Delta$ 10 contains a residual amount of the Sec61 translocon (long exposure blot), suggesting  
994 that weak binding between BiP and IRE1 $\alpha$   $\Delta$ 10 may be due to the presence of a small amount  
995 of Sec61/Sec63 in the sample. BiP bands were quantified and presented as arbitrary units (a.u)  
996 after subtracting the buffer background.  
997

#### 998 **Figure 5. A model of the Sec61/Sec63/BiP complex-mediated regulation of IRE1 $\alpha$** 999 **signaling.**

1000 (A) Step 1: The Sec61 translocon-associated Sec63 recruits and activates BiP ATPase via its  
1001 luminal J-domain to bind onto IRE1 $\alpha$ , thus preventing inappropriate activation of IRE1 $\alpha$  under  
1002 homeostatic conditions. Step 2: Upon ER stress, IRE1 $\alpha$  is oligomerized and activated because  
1003 Sec63 cannot efficiently recruit BiP, which is sequestered by misfolded proteins. The activated  
1004 IRE1 $\alpha$  mediates the splicing of the XBP1u mRNA that is bound to the Sec61 translocon through



1005 its ribosome-nascent chain. Step 3: During prolonged ER stress, the level of BiP is significantly  
1006 increased in the ER lumen. Hence, Sec63 can efficiently recruit and activate BiP to bind onto  
1007 IRE1 $\alpha$  to inhibit the oligomerization and activity of IRE1 $\alpha$ . **(B)** Step 1: IRE1 $\alpha$  can be partially  
1008 activated if it either fails to interact with the Sec61/Sec63 complex or in Sec63 depleted cells.  
1009 Step 2: Upon ER stress, IRE1 $\alpha$  quickly forms higher-order oligomers or clusters, leading to  
1010 hyper activation of IRE1 $\alpha$ . Step 3: During prolonged ER stress, BiP cannot be efficiently  
1011 recruited to inhibit IRE1 $\alpha$  higher-order oligomerization in the absence of Sec63 despite the  
1012 presence of excess BiP in the ER lumen. This leads to a severe defect in attenuation of IRE1 $\alpha$   
1013 during persistent ER stress.

1014

1015

1016

1017

1018

1019

1020

1021

1022

1023

Li et al., Figure 1

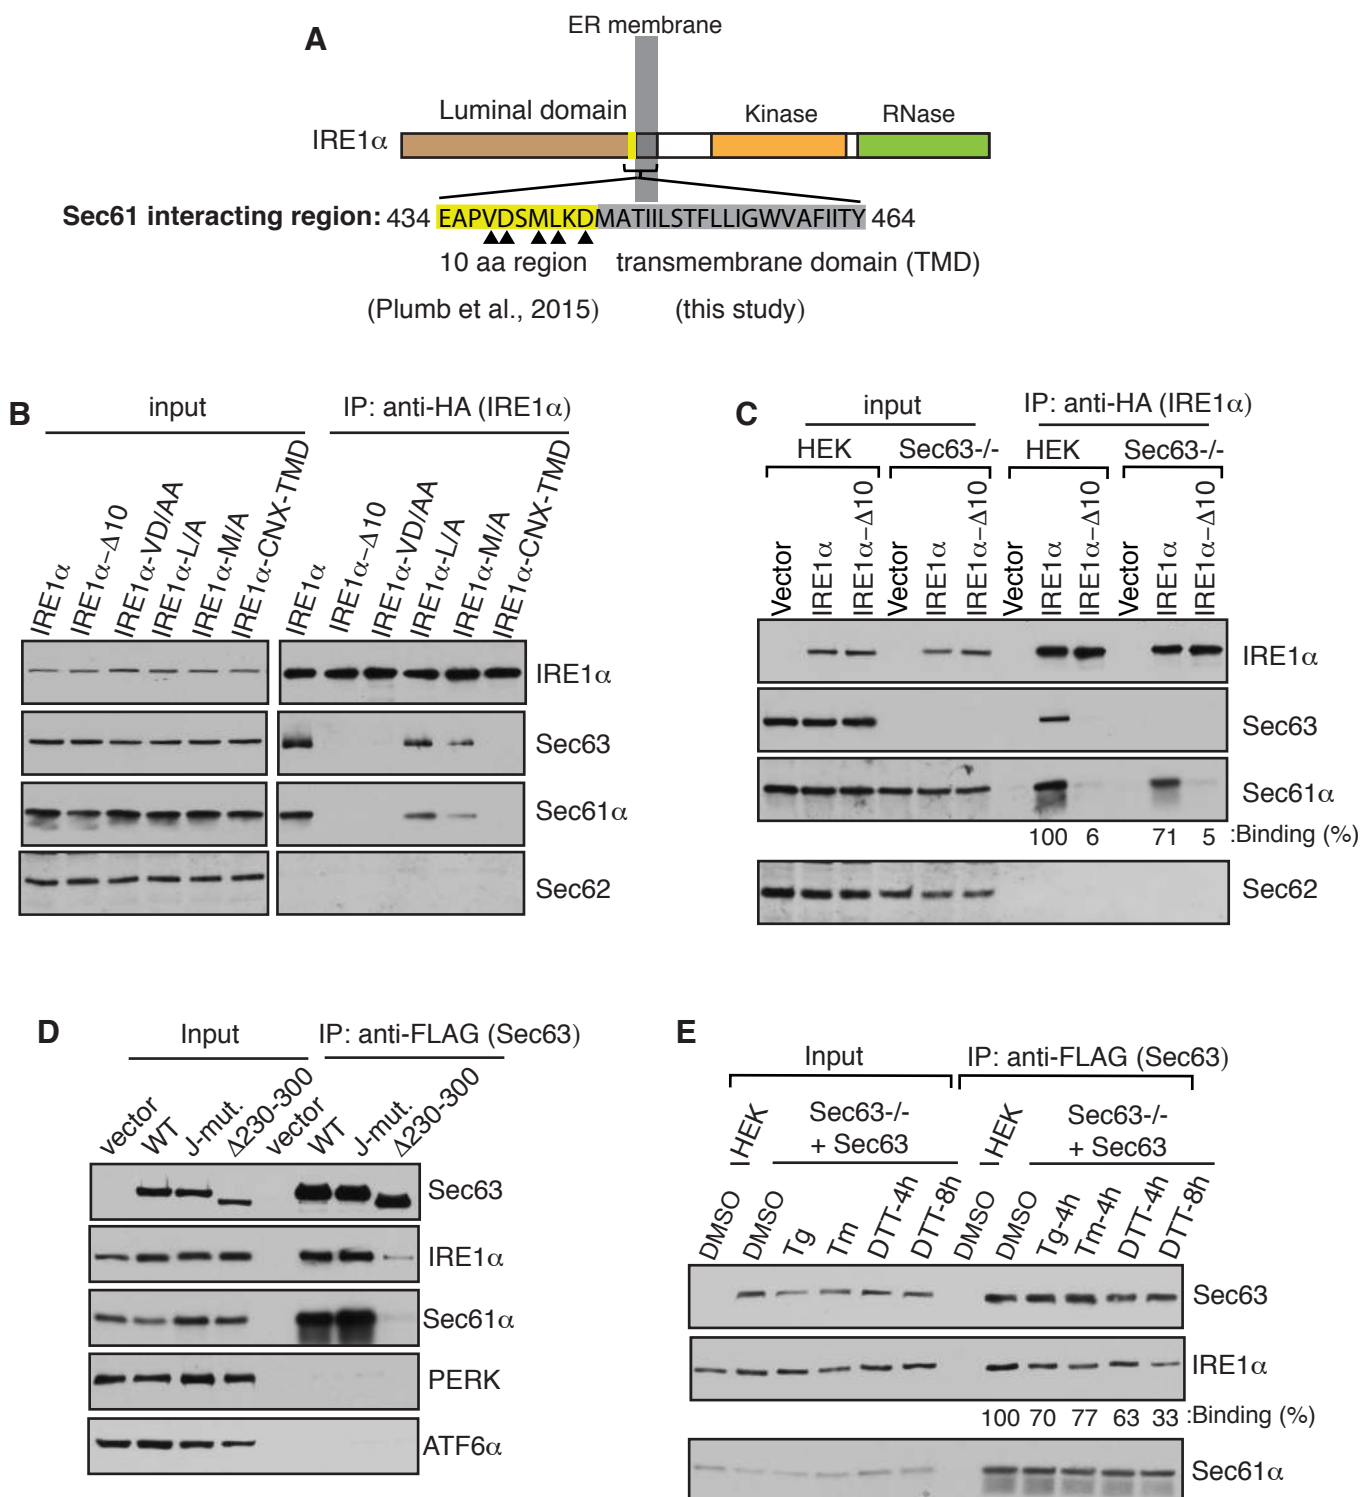

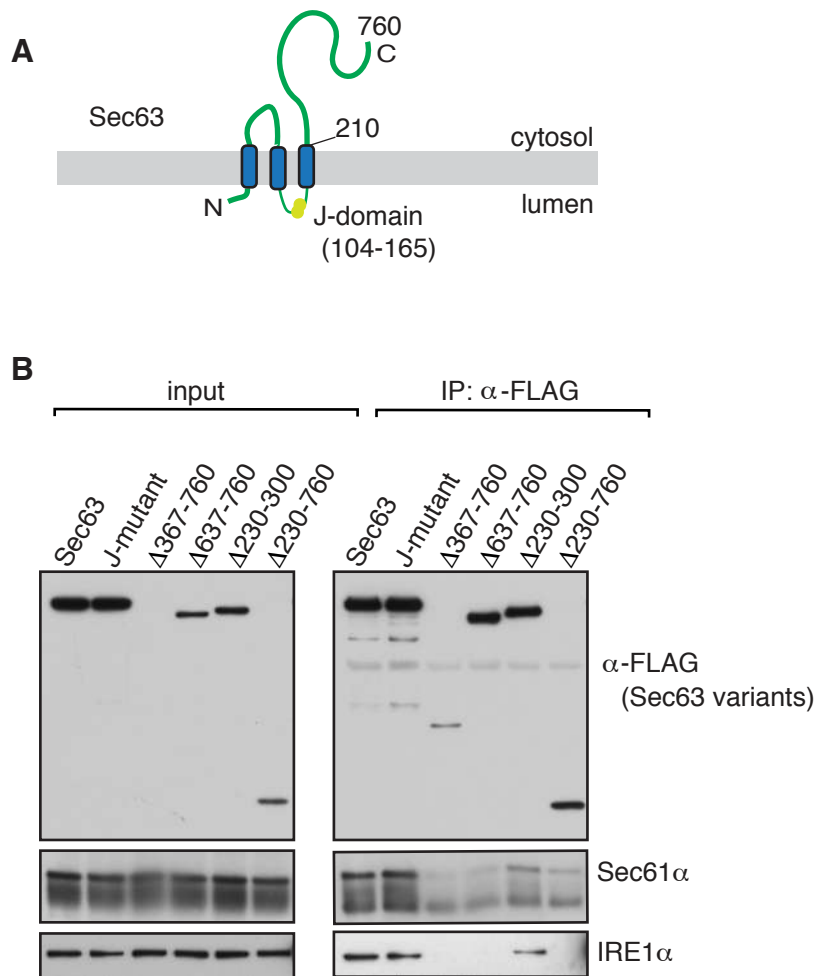

**Li et al., Figure 2**

bioRxiv preprint doi: <https://doi.org/10.1101/2020.04.03.024356>; this version posted April 4, 2020. The copyright holder for this preprint (which was not certified by peer review) is the author/funder, who has granted bioRxiv a license to display the preprint in perpetuity. It is made available under a [CC-BY-NC-ND 4.0 International license](https://creativecommons.org/licenses/by-nc-nd/4.0/).

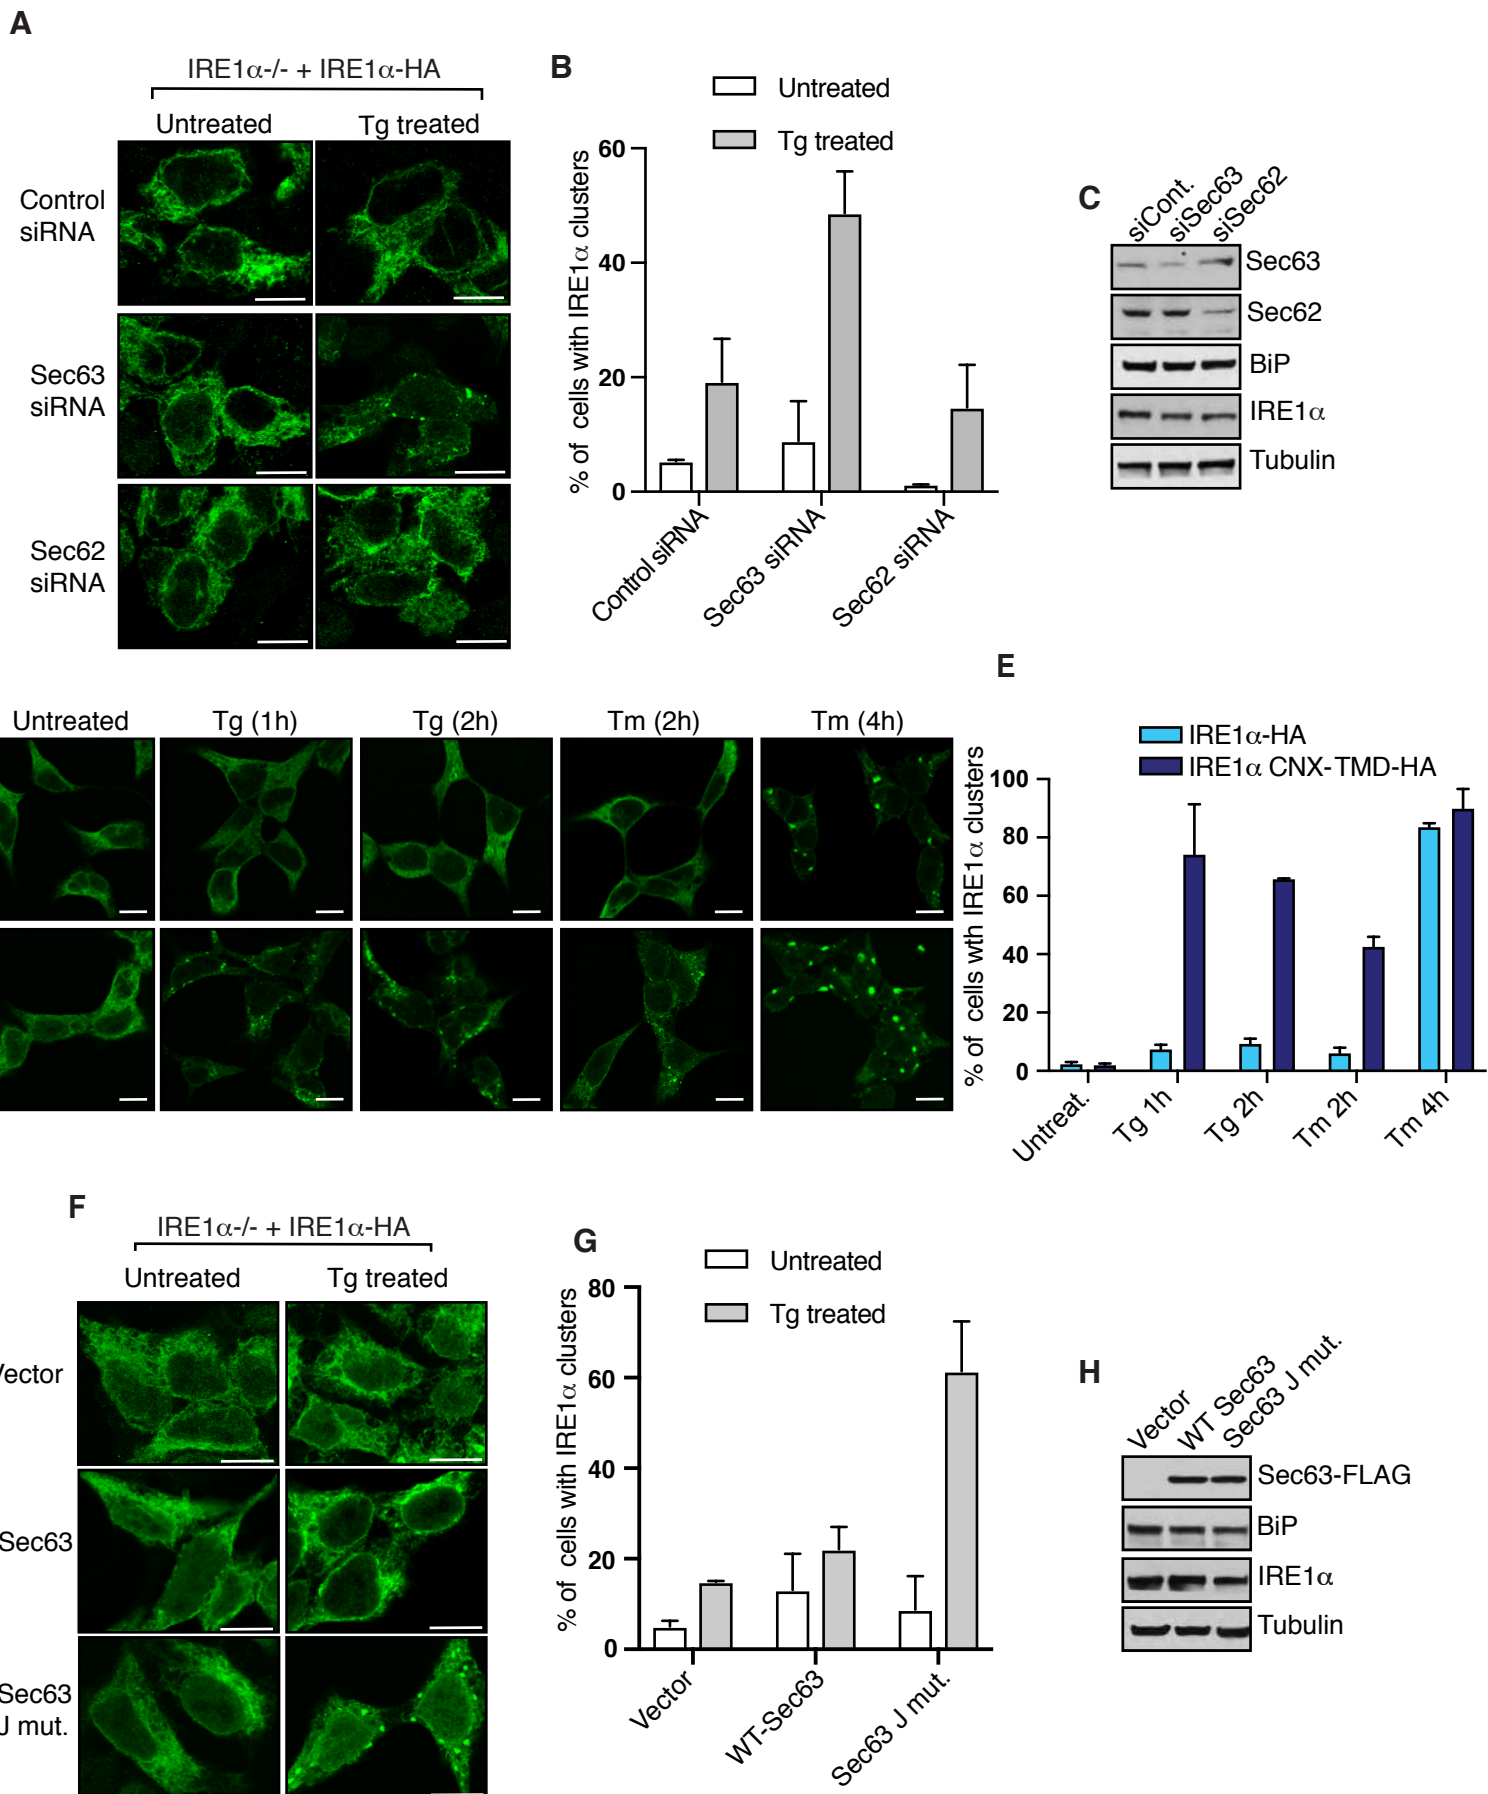

Ueda et al., Figure 3

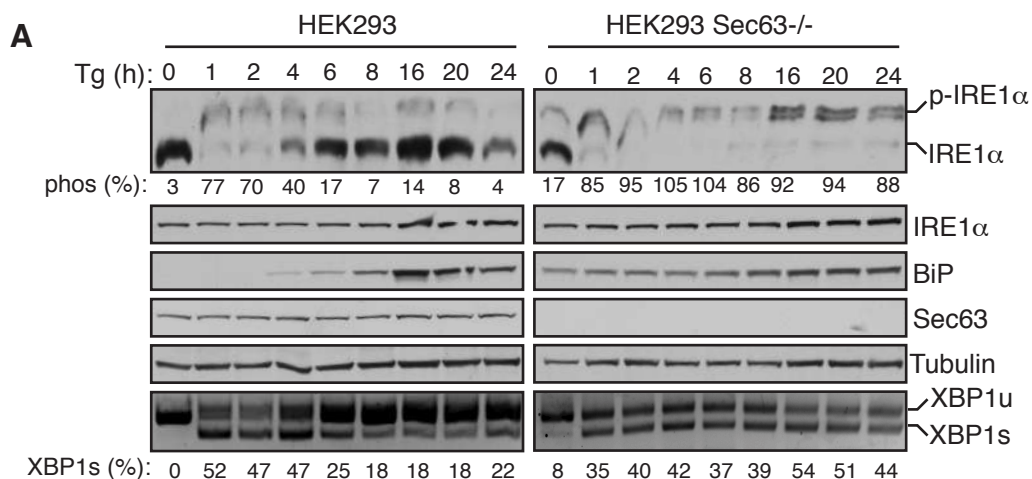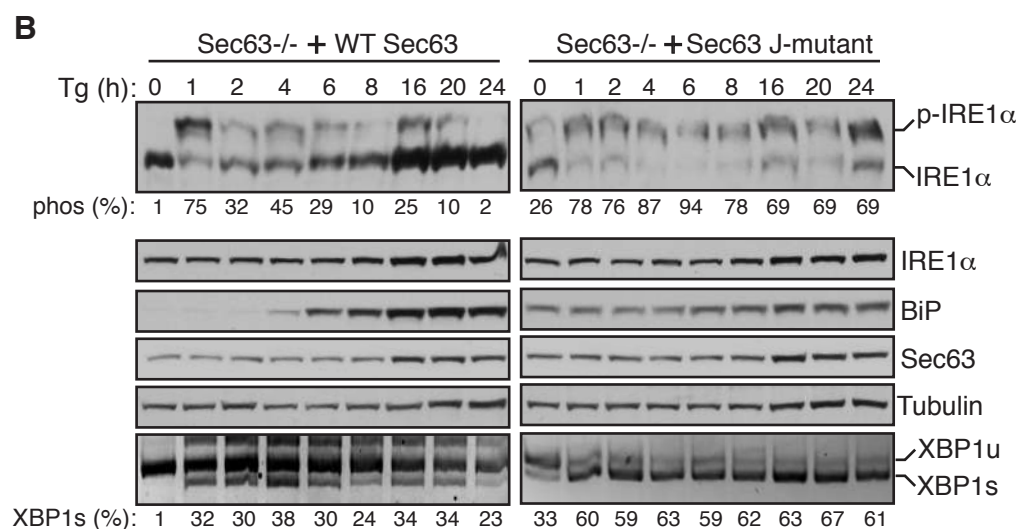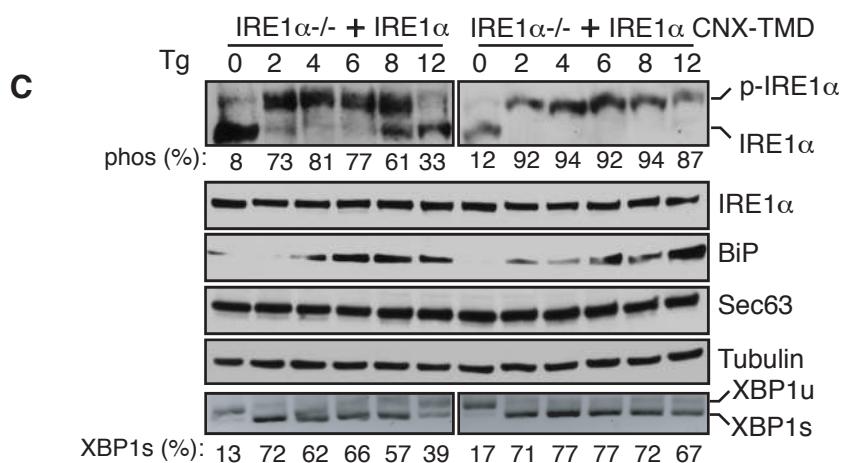



**Li et al., Figure 3 – figure supplement 1**

bioRxiv preprint doi: <https://doi.org/10.1101/2020.04.03.024356>; this version posted April 4, 2020. The copyright holder for this preprint (which was not certified by peer review) is the author/funder, who has granted bioRxiv a license to display the preprint in perpetuity. It is made available under aCC-BY-NC-ND 4.0 International license.

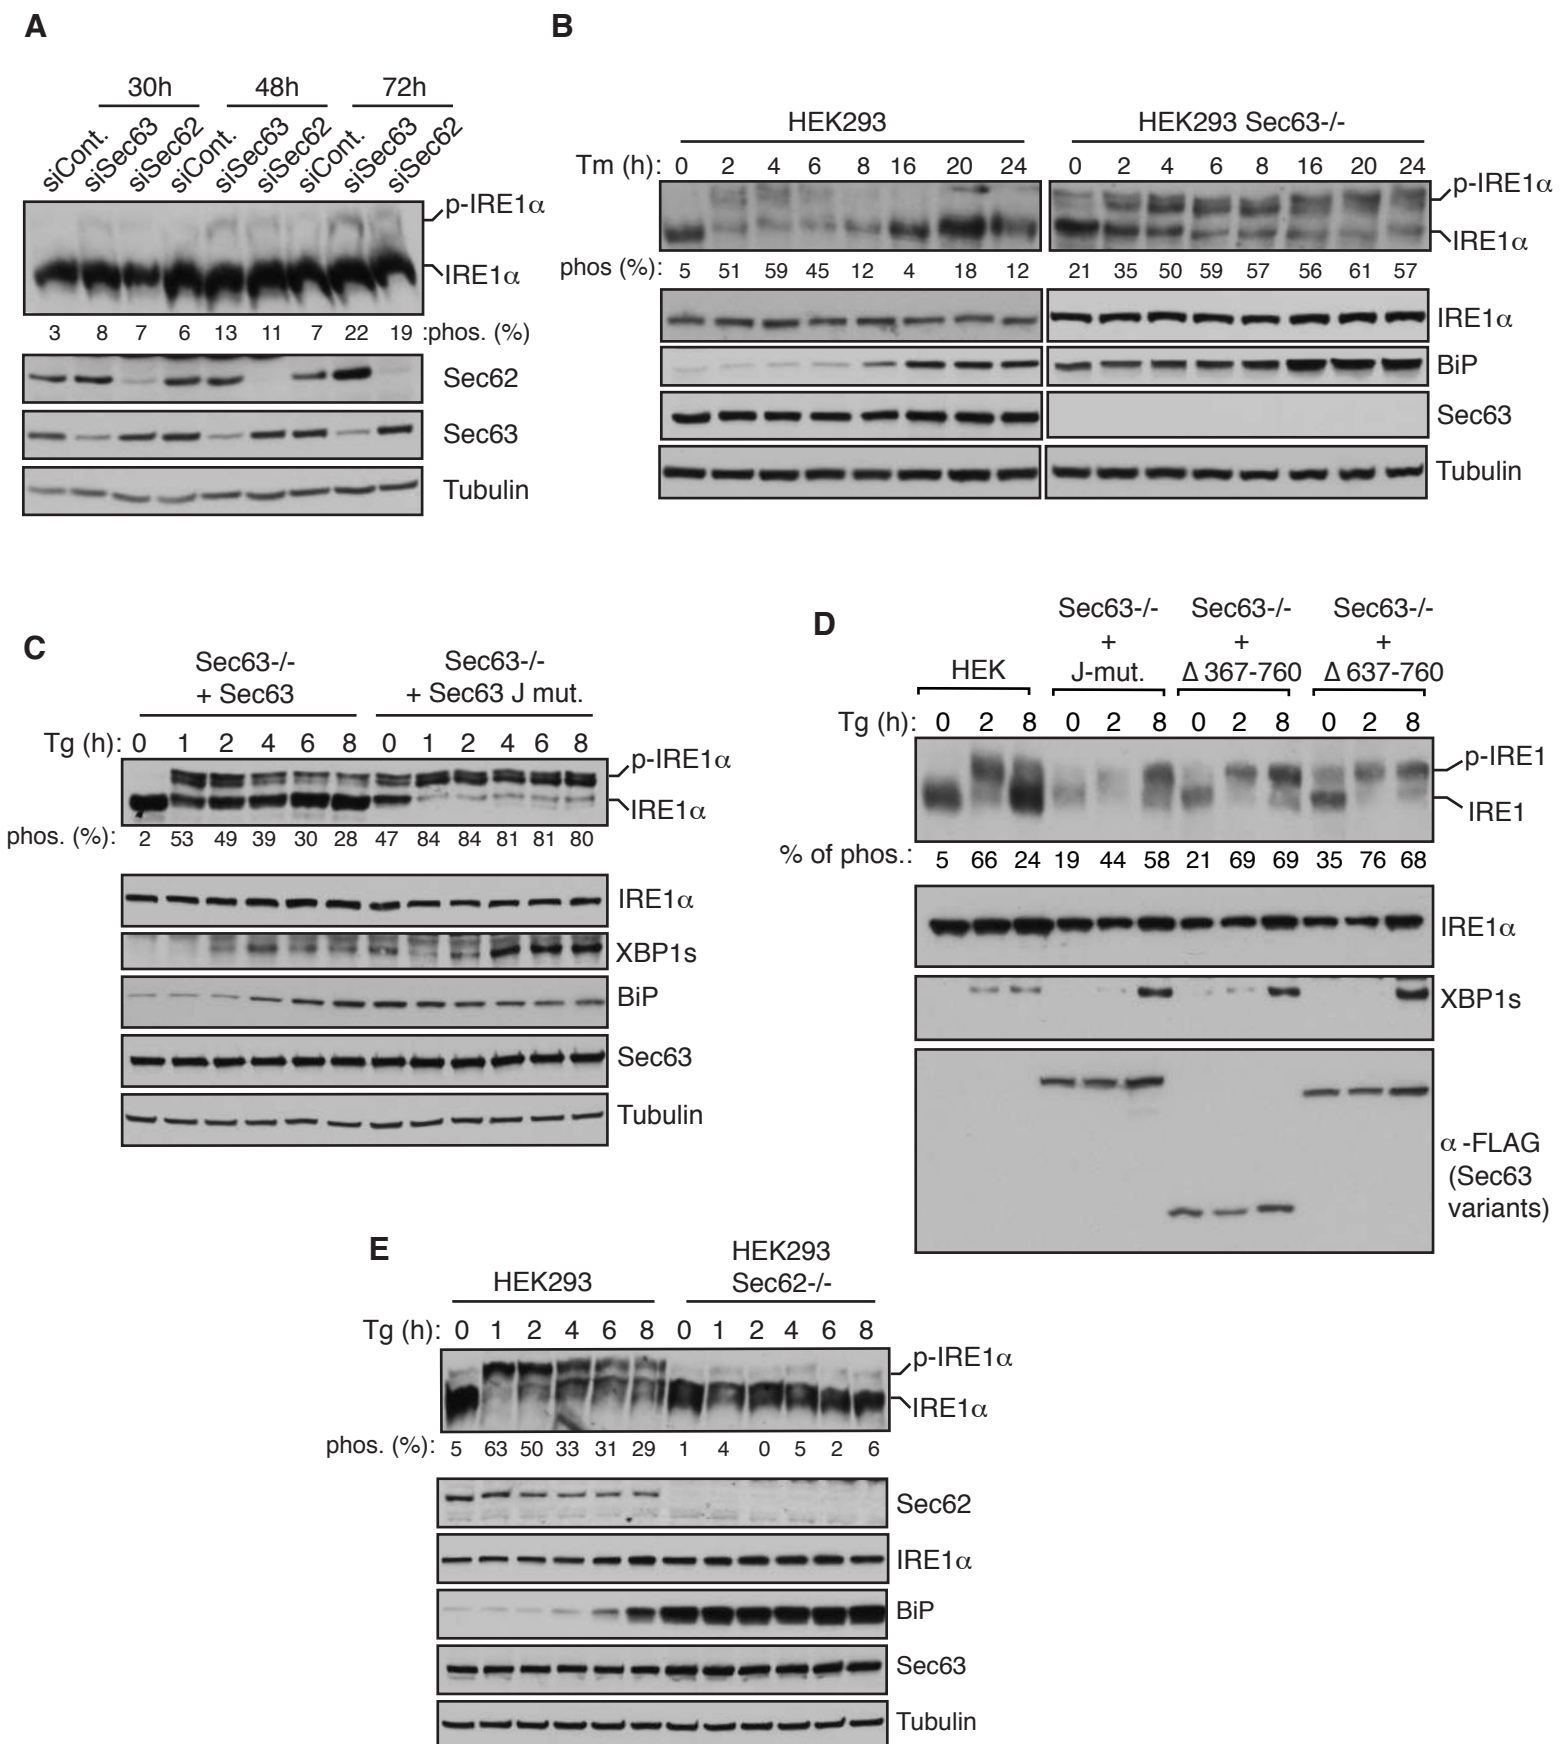

Li et al., Figure 3 – figure supplement 2

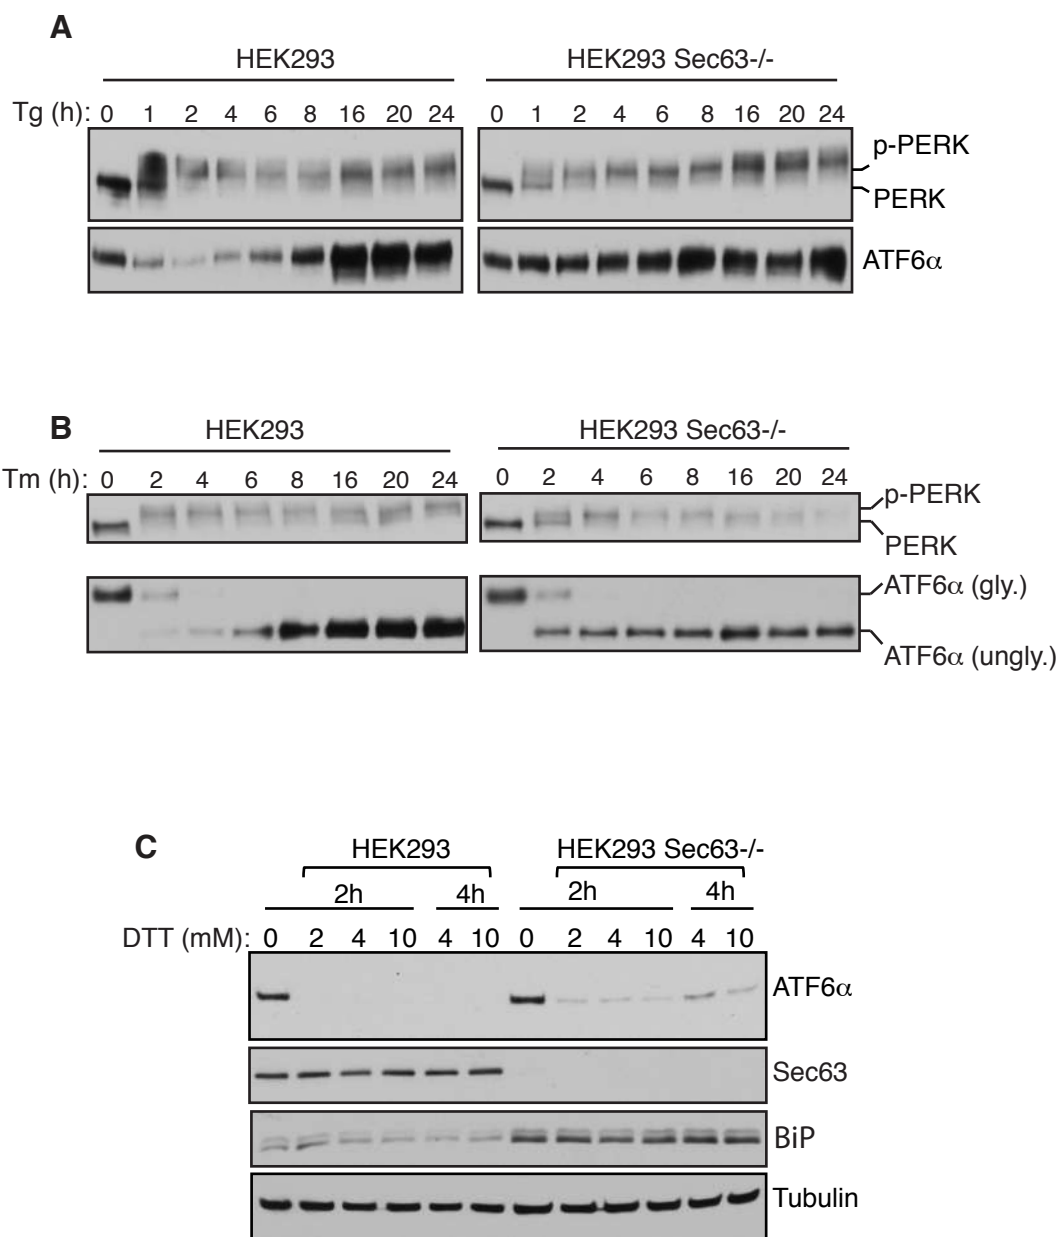

Li et al., Figure 4

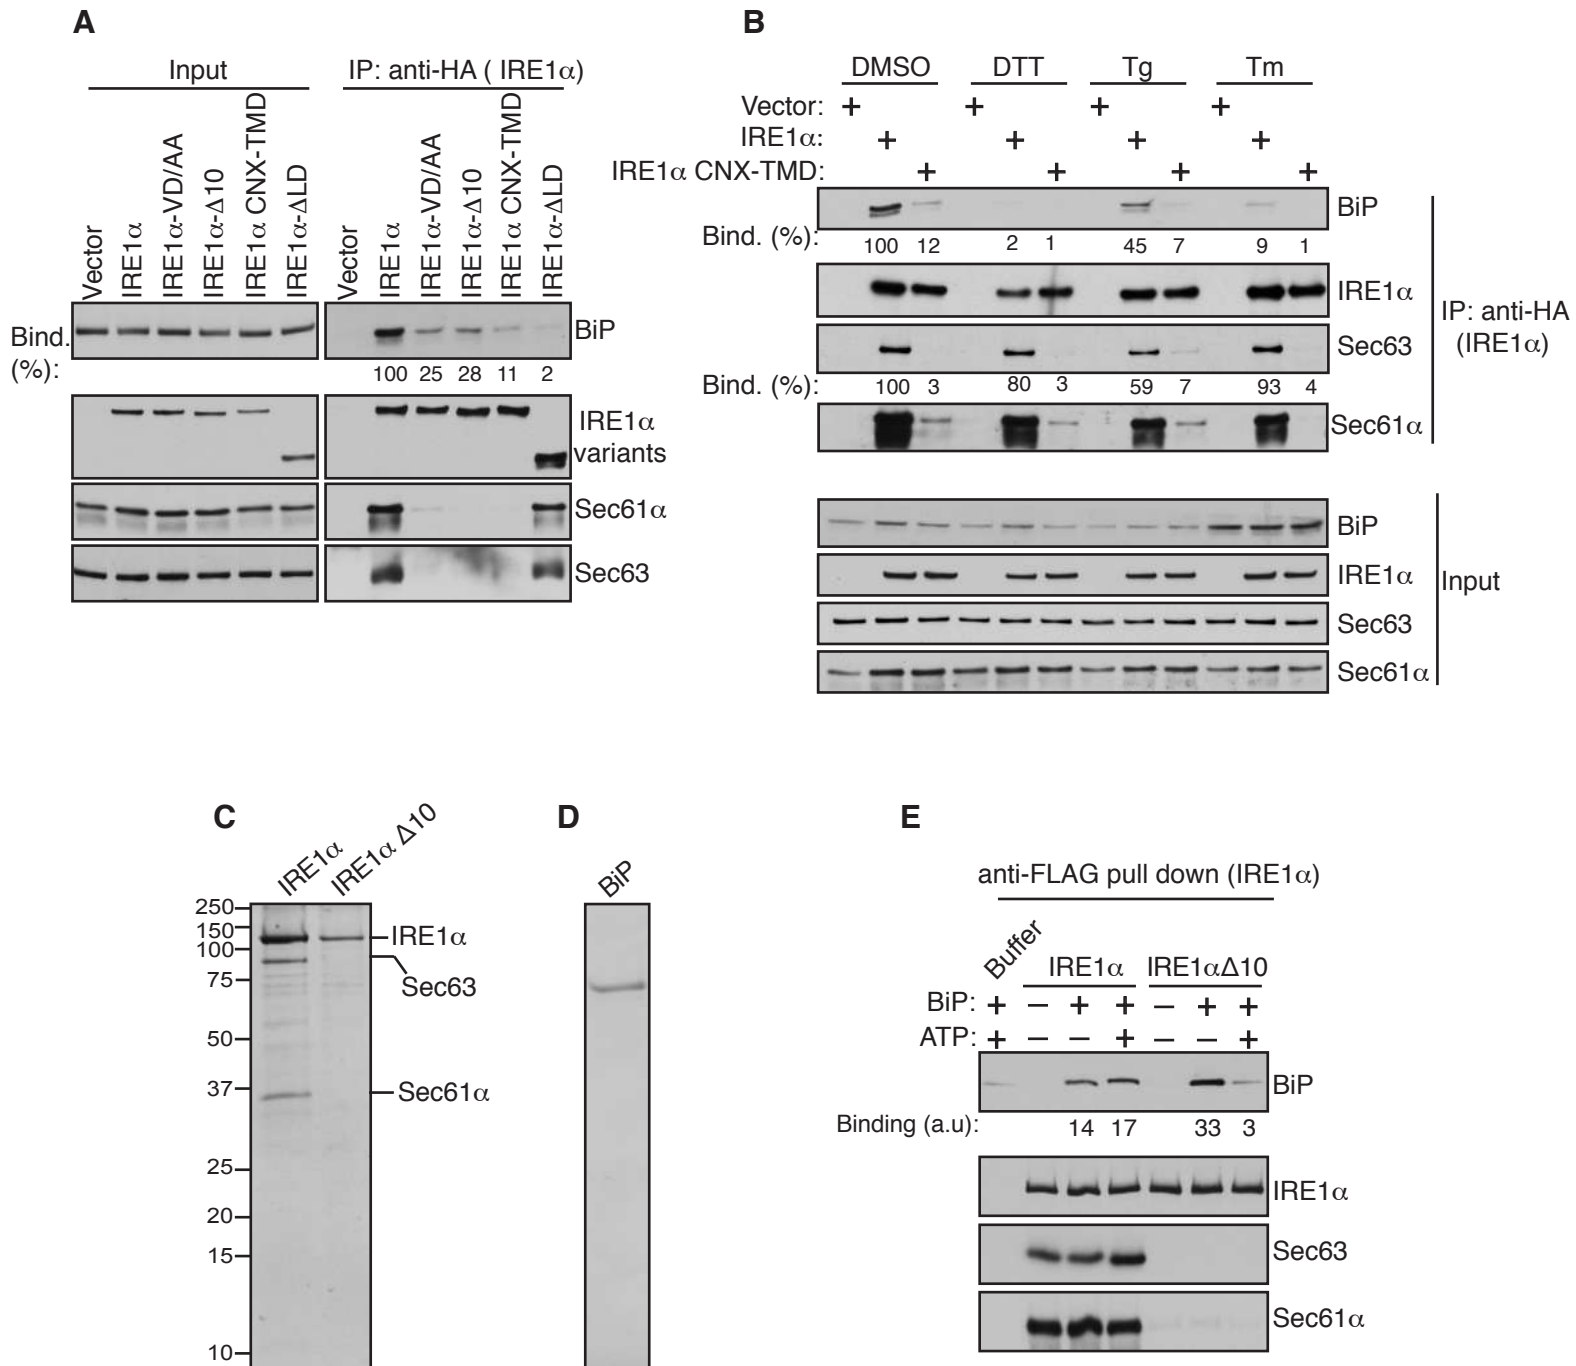

Li et al. Figure 4 - figure supplement 1

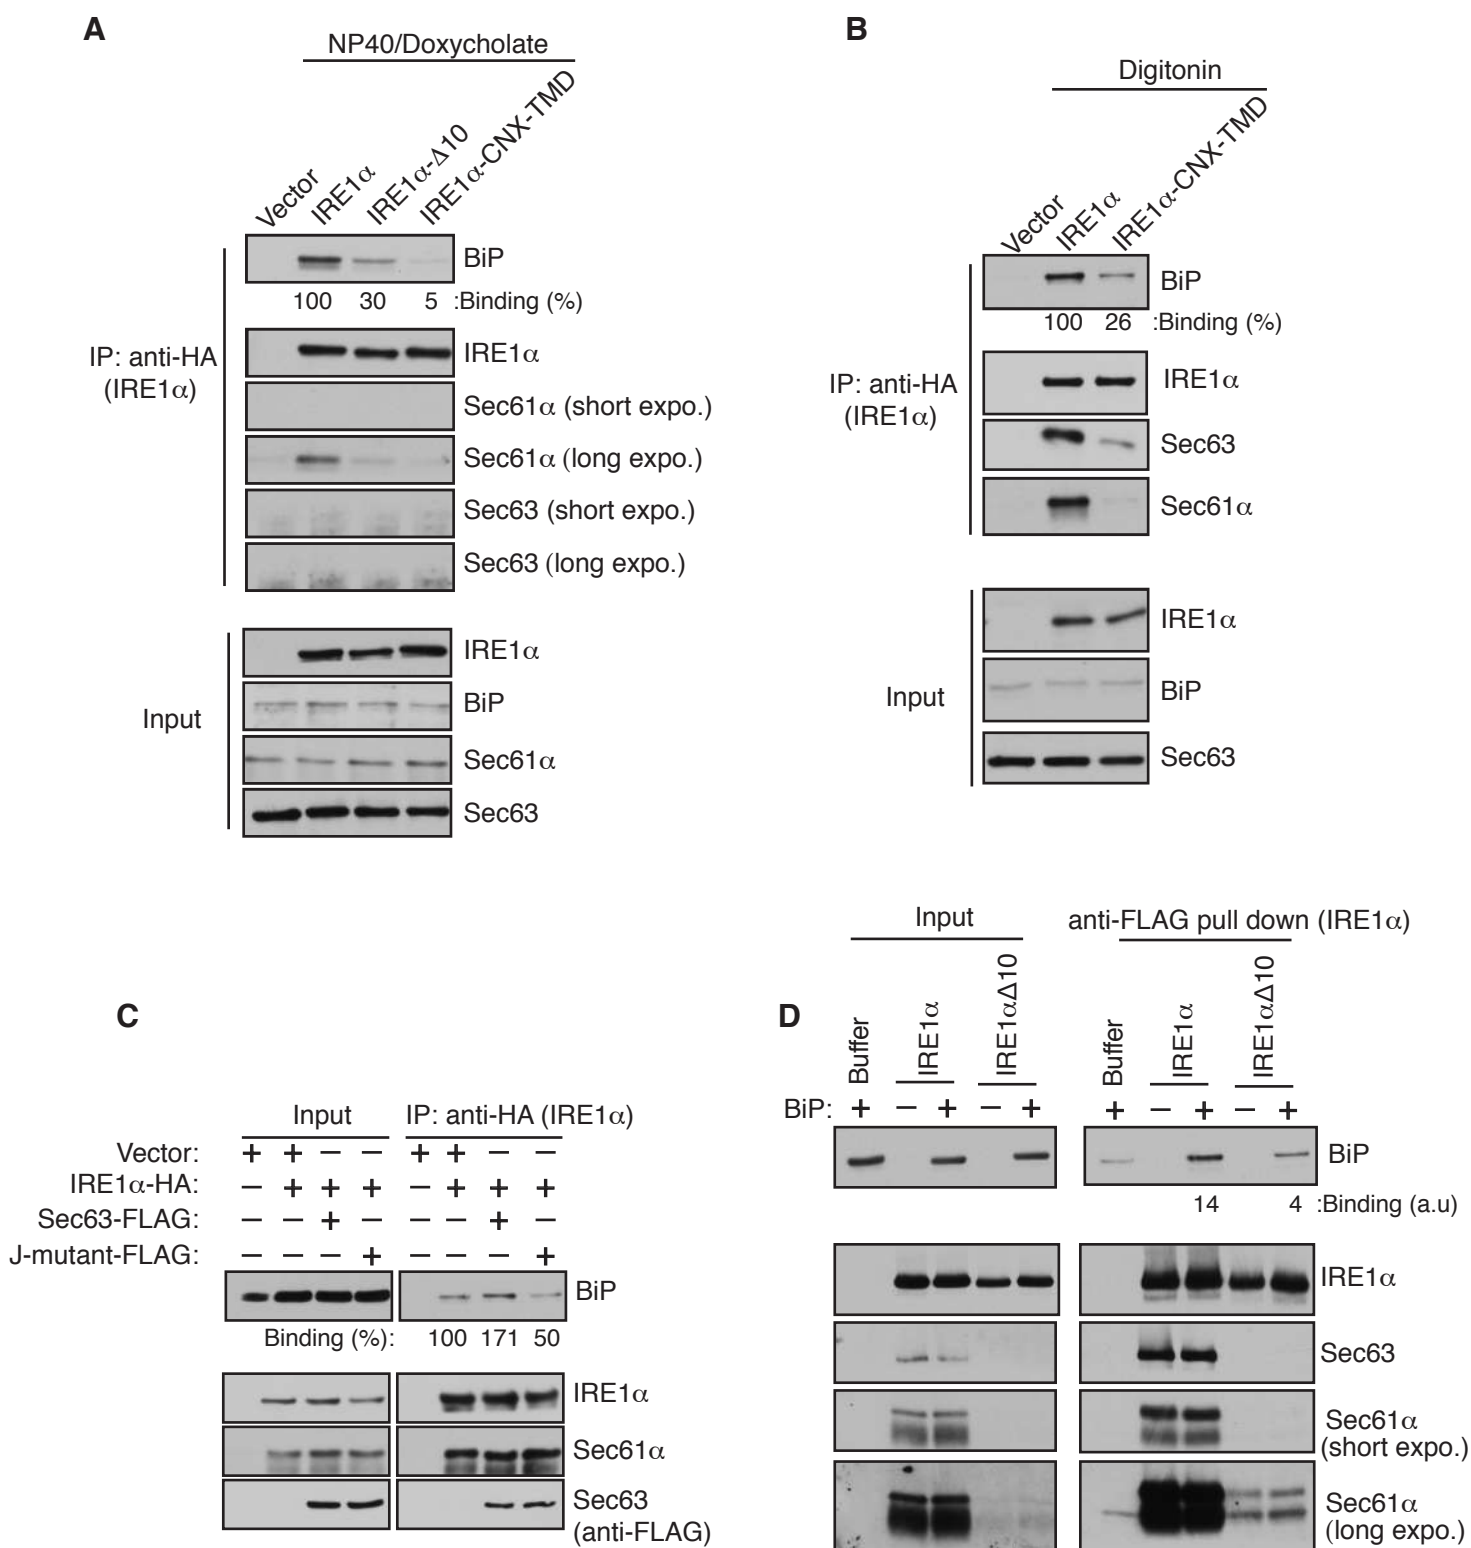

Li et al., Figure 5

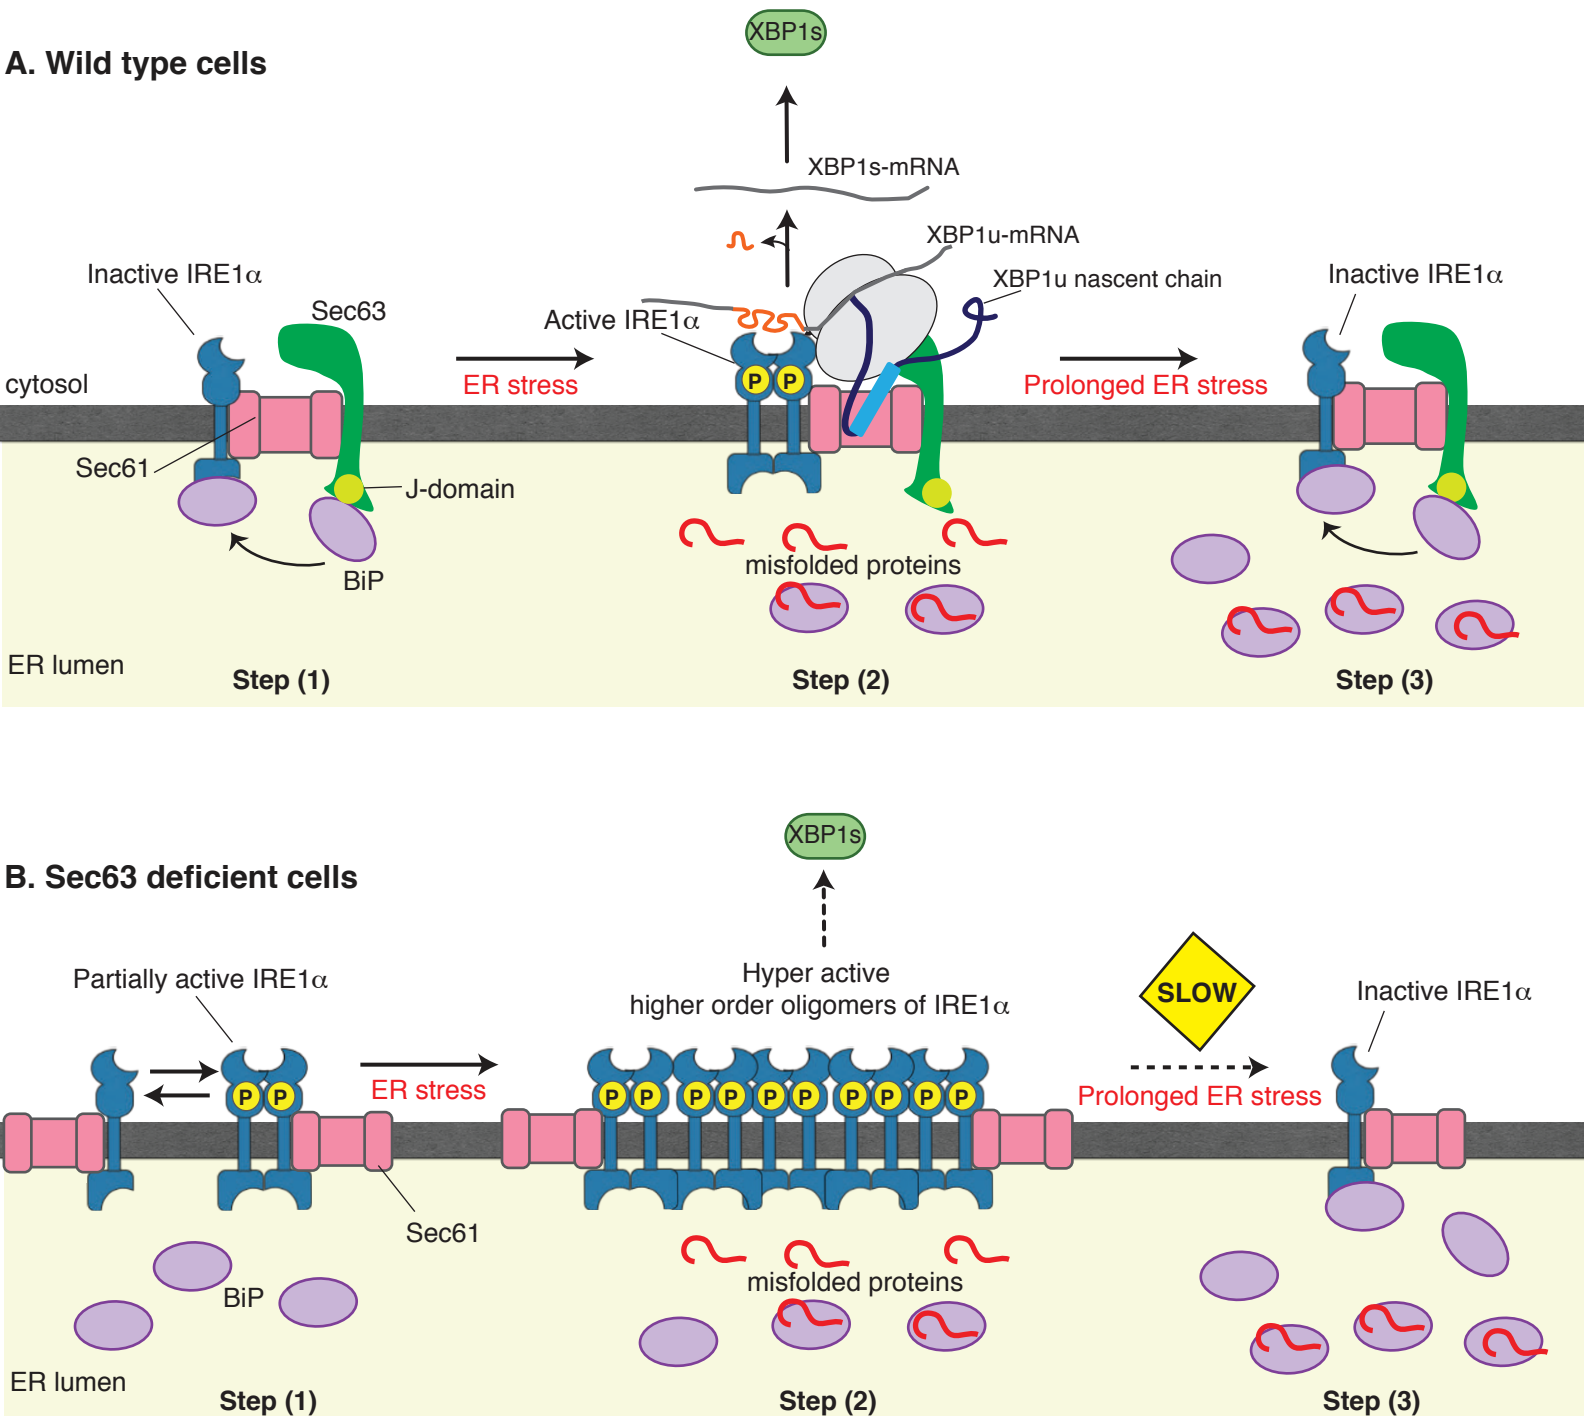

Source: https://www.biorxiv.org/content/10.1101/2020.04.03.024356v1.full.pdf
